# Supplementary material for: What can qualitative research do for randomised controlled trials? A systematic mapping review
Source: PubMed Central journal article supplement — BMJ Open. 2013 May 31;3(6):e002889. doi: 10.1136/bmjopen-2013-002889 (PMC3669723; doi:10.1136/bmjopen-2013-002889), 2013-05-31
Supplement: bmjopen-2013-002889.draft_revisions.pdf [file bmjopen-2013-002889.draft_revisions.pdf]

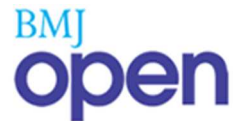

## What can qualitative research do for randomised controlled trials? A systematic mapping review

|                                 |                                                                                                                                                                                                                                                                                                                                                                                                                                                                                                                                                                                      |
|---------------------------------|--------------------------------------------------------------------------------------------------------------------------------------------------------------------------------------------------------------------------------------------------------------------------------------------------------------------------------------------------------------------------------------------------------------------------------------------------------------------------------------------------------------------------------------------------------------------------------------|
| Journal:                        | <i>BMJ Open</i>                                                                                                                                                                                                                                                                                                                                                                                                                                                                                                                                                                      |
| Manuscript ID:                  | bmjopen-2013-002889                                                                                                                                                                                                                                                                                                                                                                                                                                                                                                                                                                  |
| Article Type:                   | Research                                                                                                                                                                                                                                                                                                                                                                                                                                                                                                                                                                             |
| Date Submitted by the Author:   | 15-Mar-2013                                                                                                                                                                                                                                                                                                                                                                                                                                                                                                                                                                          |
| Complete List of Authors:       | O'Cathain, Alicia; The University of Sheffield, Medical Care Research Unit, School of Health and Related Research (SCHARR)<br>Thomas, Kate; The University of Sheffield, Medical Care Research Unit, School of Health and Related Research (SCHARR)<br>Drabble, Sarah; The University of Sheffield, Medical Care Research Unit, School of Health and Related Research (SCHARR)<br>Rudolph, Anne; The University of Sheffield, Medical Care Research Unit, School of Health and Related Research (SCHARR)<br>Hewison, Jenny; University of Leeds, Psychiatry and Behavioural Sciences |
| <b>Primary Subject Heading</b>: | Research methods                                                                                                                                                                                                                                                                                                                                                                                                                                                                                                                                                                     |
| Secondary Subject Heading:      | Qualitative research, Evidence based practice                                                                                                                                                                                                                                                                                                                                                                                                                                                                                                                                        |
| Keywords:                       | STATISTICS & RESEARCH METHODS, QUALITATIVE RESEARCH, Clinical trials < THERAPEUTICS                                                                                                                                                                                                                                                                                                                                                                                                                                                                                                  |
|                                 |                                                                                                                                                                                                                                                                                                                                                                                                                                                                                                                                                                                      |

SCHOLARONE™  
Manuscripts

only

1  
2  
3 **What can qualitative research do for randomised controlled trials? A systematic mapping review**  
4  
5  
6  
7  
8  
9  
10

11 O’Cathain A, Medical Care Research Unit, School of Health and Related Research (ScHARR),  
12 University of Sheffield, Regent Street, Sheffield S1 4DA, UK, Professor of Health Services Research  
13

14 Thomas KJ, Medical Care Research Unit, School of Health and Related Research (ScHARR), University  
15 of Sheffield, Regent Street, Sheffield S1 4DA, UK, Honorary Professor of Health Services Research  
16

17 Drabble SJ, Medical Care Research Unit, School of Health and Related Research (ScHARR), University  
18 of Sheffield, Regent Street, Sheffield S1 4DA, UK, Research Associate  
19

20 Rudolph A, Medical Care Research Unit, School of Health and Related Research (ScHARR), University  
21 of Sheffield, Regent Street, Sheffield S1 4DA, UK, Research Associate  
22

23 Hewison J, Leeds Institute of Health Sciences, University of Leeds, 101 Clarendon Road, Leeds, LS2  
24 9LJ, Professor of the Psychology of Healthcare  
25  
26  
27  
28  
29  
30  
31  
32  
33  
34  
35  
36  
37

38 Corresponding author:

39 O’Cathain A

40 Medical Care Research Unit

41 School of Health and Related Research (ScHARR)

42 University of Sheffield

43 Regent Street

44 Sheffield S1 4DA

45 UK  
46  
47  
48  
49  
50  
51  
52  
53  
54  
55

56 a.ocathain@sheffield.ac.uk  
57  
58  
59  
60

## ABSTRACT

**Objective** To develop an empirically-based framework of the aspects of randomised controlled trials addressed by qualitative research.

**Design** Systematic mapping review of qualitative research undertaken with randomised controlled trials and published in peer-reviewed journals.

**Data sources** Medline, Premedline, Embase, The Cochrane Library, Health Technology Assessment, PsychINFO, CINAHL, British Nursing Index, Social Sciences Citation Index and ASSIA.

**Eligibility criteria** Articles reporting qualitative research undertaken with trials published between 2008 and September 2010; health research; reported in English.

**Results** 296 articles met the inclusion criteria. Articles focused on 22 aspects of the trial within five broad categories. Some articles focused on more than one aspect of the trial, totalling 356 examples. The qualitative research focused on the intervention being trialled (71%, 254/356); the design, process and conduct of the trial (15%, 54/356); the outcomes of the trial (1%, 5/356); the measures used in the trial (3%, 10/356); and the target condition for the trial (9%, 33/356). A minority of the qualitative research was undertaken at the pre-trial stage (28%, 82/296). The value of the qualitative research to the trial itself was not always made explicit within the articles. The potential value included optimising the intervention and trial conduct, facilitating interpretation of trial findings, helping trialists to be sensitive to the human beings involved in trials, and saving money by steering researchers towards interventions more likely to be effective in future trials.

**Conclusions** A large amount of qualitative research undertaken with specific trials has been published, addressing a wide range of aspects of trials, with the potential to improve the endeavour of generating evidence of effectiveness of health interventions. Researchers can increase the impact of this work on trials by undertaking more of it at the pre-trial stage and being explicit within their articles about the learning for trials and evidence-based practice.

**Key words:** qualitative research, randomised controlled trials

**Word count** 3517

**Article focus**

- Qualitative research is undertaken with randomised controlled trials (RCTs)
- A systematic review of journal articles identified 296 reporting the qualitative research undertaken with trials in 2008-2010
- 22 ways in which qualitative research is used with trials are reported, with examples

**Key messages**

- Qualitative research addressed a wide range of aspects of trials focusing on the intervention being trialled (71%); the design, process and conduct of the trial (15%); the outcomes of the trial (1%); the measures used in the trial (3%); and the target condition for the trial (9%)
- A minority of the qualitative research was undertaken at the pre-trial stage (28%, 82/296)
- The value of the qualitative research to the trial itself was not always made explicit within the articles

**Strengths and limitations of this study**

- One strength of the framework developed here is that it was based on published international research which is available to those making use of evidence of effectiveness
- One limitation is that not all qualitative research undertaken with trials is published in peer-reviewed journals

## **Background**

Qualitative research is often undertaken with randomised controlled trials (RCTs) to understand the complexity of interventions, and the complexity of the social contexts in which interventions are tested, when generating evidence of effectiveness of treatments and technologies. In the 2000s, the Medical Research Council framework for the development and evaluation of complex interventions highlighted the utility of using a variety of methods at different phases of the evaluation process, including qualitative research.[1-3] For example, qualitative research can be used with randomised controlled trials, either alone or as part of a mixed methods process evaluation, to consider how interventions are delivered in practice.[4] The potential value of understanding how actual implementation differs from planned implementation includes the ability to explain null trial findings or to identify issues important to the transferability of an effective intervention outside experimental conditions. Excellent examples exist of the use of qualitative research with randomised controlled trials which explicitly identify the value of the qualitative research to the trial with which it was undertaken. These include its use in facilitating interpretation of pilot trial findings,[5] and improving the conduct of a feasibility trial by both highlighting reasons for poor recruitment and solutions that increased recruitment.[6] That is, qualitative research is undertaken with randomised controlled trials in order to enhance the evidence of effectiveness produced by the trial or facilitate the feasibility or efficiency of the trial itself.

Researchers have discussed the variety of possible ways in which qualitative research can be used with trials, presenting these within a temporal framework of qualitative research undertaken before, during and after a trial.[7-9] However, qualitative research may be used quite differently in practice and it is important to consider how qualitative research is actually used with trials, as well as its value in terms of contributing to the generation of evidence of effectiveness of treatments and services to improve health and health care. Consideration of how qualitative research is being used can identify ways of improving this endeavour and help future researchers maximise its value. For example, an excellent study of how qualitative research was used with trials of interventions to change professional practice or the organisation of care identified methodological shortcomings of the qualitative research and a lack of integration of findings from the qualitative research and trial.[7] Additionally, systematic organisation of the range of ways researchers use qualitative research with trials, such as the temporal framework, can help to educate researchers new to this endeavour about the possible uses of qualitative research, and help experienced researchers to decide how qualitative research can best be used when designing and undertaking trials. A review of practice also offers an opportunity for the research community to reflect on how they practice this endeavour. Our objective was to develop an empirically-based framework to map the aspects of trials addressed by qualitative research in current international practice, and identify the potential value of this contribution to the generation of evidence of effectiveness of health interventions.

## **Methods**

We undertook a 'systematic mapping review' of published journal articles reporting qualitative research undertaken with specific trials rather than qualitative research undertaken about trials in general. The aim of this type of review, also called a 'mapping review' or 'systematic map', is to map out and categorise existing literature on a particular topic, with further review work expected.[10]

Formal quality appraisal is not expected and synthesis is graphical or tabular. This mapping review involved a systematic search for published articles of qualitative research undertaken with trials. The aim was not to synthesise the findings from these articles but to categorise them into an inductively developed framework. The review was of published journal articles rather than unpublished research because these are accessible to individuals making use of evidence of effectiveness.

### The search strategy

We searched the following databases for articles published between 2001 and September 2010: Medline, Premedline, Embase, The Cochrane Library, Health Technology Assessment, PsychINFO, CINAHL, British Nursing Index, Social Sciences Citation Index and ASSIA. We used two sets of search terms to identify articles using qualitative research in the context of a specific trial. We adapted the Cochrane Highly Sensitive Search Strategy for identifying randomised trials in Medline.[11] The search terms for qualitative research were more challenging. We started with a qualitative research filter,[12] but this returned many articles which were not relevant to our study. We made decisions about the terms to use for the final search in an iterative manner, balancing the need for comprehensiveness and relevance.[13] (see Figure 1 for search terms). We identified 15208 references, reduced to 10822 after electronic removal of duplicates. We downloaded these references to a data management software programme (EndNote X5).

**Figure 1 Search terms used in systematic mapping review**

| Original terms identified in study proposal      |                                                                | Additional search terms added to the search |
|--------------------------------------------------|----------------------------------------------------------------|---------------------------------------------|
| <u>Terms to identify RCT</u>                     | <u>Terms to identify qualitative research</u>                  |                                             |
| randomised control\$<br>trial\$.mp               | qualitative research.mp. OR<br>qualitative research/           |                                             |
| clinical trial.mp OR<br>clinical trial/          | (qualitative ADJ3 method\$).mp                                 |                                             |
| pragmatic trial.mp                               | ((qualitative ADJ3 study) OR<br>(qualitative ADJ3 studies)).mp |                                             |
| complex<br>intervention.mp                       | (focus group\$ OR focus-group\$).mp                            |                                             |
| (controlled trial\$ OR<br>controlled-trial\$).mp | narrative analysis.mp                                          |                                             |
|                                                  | grounded theory.mp                                             |                                             |
|                                                  | process evaluation.mp                                          |                                             |

|  |                                                                                                               |                                                                                                                      |
|--|---------------------------------------------------------------------------------------------------------------|----------------------------------------------------------------------------------------------------------------------|
|  | (mixed method\$ OR mixed-method\$).mp                                                                         |                                                                                                                      |
|  | observation\$.mp (EXCLUDED)                                                                                   |                                                                                                                      |
|  | interview\$ (EXCLUDED)                                                                                        | (in-depth ADJ4 interview\$).mp                                                                                       |
|  |                                                                                                               | (((((semi structured ADJ5 interview\$) OR semistructured) ADJ5 interview\$) OR semi-structured) ADJ5 interview\$).mp |
|  |                                                                                                               | qualitative interview\$.mp                                                                                           |
|  |                                                                                                               | (interview\$ AND theme\$).mp                                                                                         |
|  |                                                                                                               | (interview\$ AND (audio recorded OR audio-recorded)).mp                                                              |
|  |                                                                                                               | case studies (EXCLUDED)                                                                                              |
|  | (descriptive case study OR descriptive case studies OR descriptive case-study OR descriptive case-studies).mp |                                                                                                                      |
|  | qualitative (EXCLUDED)                                                                                        | qualitative exploration.mp                                                                                           |
|  |                                                                                                               | (qualitative analysis OR qualitative analyses OR qualitatively analy?ed).mp                                          |
|  |                                                                                                               | (qualitative ADJ3 data).mp                                                                                           |
|  |                                                                                                               | qualitative evaluation.mp                                                                                            |
|  |                                                                                                               | qualitative intervention.mp                                                                                          |
|  |                                                                                                               | qualitative approach.mp                                                                                              |
|  |                                                                                                               | qualitative inquiry.mp                                                                                               |
|  |                                                                                                               | discourse analysis.mp                                                                                                |
|  |                                                                                                               | discursive.mp                                                                                                        |
|  | phenomenological.mp                                                                                           |                                                                                                                      |

1  
2  
3  
4  
5  
6  
7  
8  
9  
10  
11  
12  
13  
14  
15  
16  
17  
18  
19  
20  
21  
22  
23  
24  
25  
26  
27  
28  
29  
30  
31  
32  
33  
34  
35  
36  
37  
38  
39  
40  
41  
42  
43  
44  
45  
46  
47  
48  
49  
50  
51  
52  
53  
54  
55  
56  
57  
58  
59  
60

|  |  |                                               |
|--|--|-----------------------------------------------|
|  |  | thematic analysis.mp                          |
|  |  | ethnograph\$.mp                               |
|  |  | action research.mp                            |
|  |  | (ethno methodology OR<br>ethnomethodology).mp |
|  |  | social construction\$.mp                      |
|  |  | NOT phenomenological<br>characteristics.mp    |
|  |  | NOT phenomenological model.mp                 |
|  |  | NOT action research arm test.mp               |
|  |  | NOT protocol.ti                               |

#### Inclusion and exclusion criteria

Our inclusion criteria were articles published in English between 2001 and September 2010, reporting the findings of empirical qualitative research studies undertaken before, during or after a specific randomised controlled trial in the field of health. These could include qualitative research reported within a mixed methods article. Our exclusion criteria were that an article was not a journal article (e.g. conference proceedings, book chapter); no abstract available; not a specific trial (e.g. qualitative research about hypothetical trials or trials in general); not qualitative research (qualitative data collection and analysis were required for inclusion); not health (e.g. education); not a report of findings of empirical research (e.g. published protocol, methodological paper, editorial); not reported in English; and not human research.

#### Screening references and abstracts

We applied the exclusion criteria electronically to the 10822 references and abstracts. The numbers of references we identified increased steadily between 2001 and 2009 (Figure 2). The year 2010 is not reported in Figure 2 because we did not search the full year. Due to the large number of references identified, and the need to read abstracts and full articles for further selection and categorisation, we made the decision to focus on articles published between January 2008 and September 2010. The rationale was that the most recently published articles would offer the most useful insights for future practice. In this shorter time period there were 3745 references and abstracts, with 739 of these excluded by electronic application of exclusion criteria. One of the research team (SJD) read the abstracts of the remaining 3006 references and excluded a further 2,506. A sample of 100 exclusions was checked by AOC and KJT and there was full agreement with exclusion decisions made by SJD. The most common reasons for exclusion were that the abstract did



not refer to an RCT, did not use qualitative research or did not report empirical research (Figure 3).  
500 abstracts remained after this screening process.

**Figure 2 Numbers of references identified for qualitative research undertaken with RCTs between 2001 and 2009**

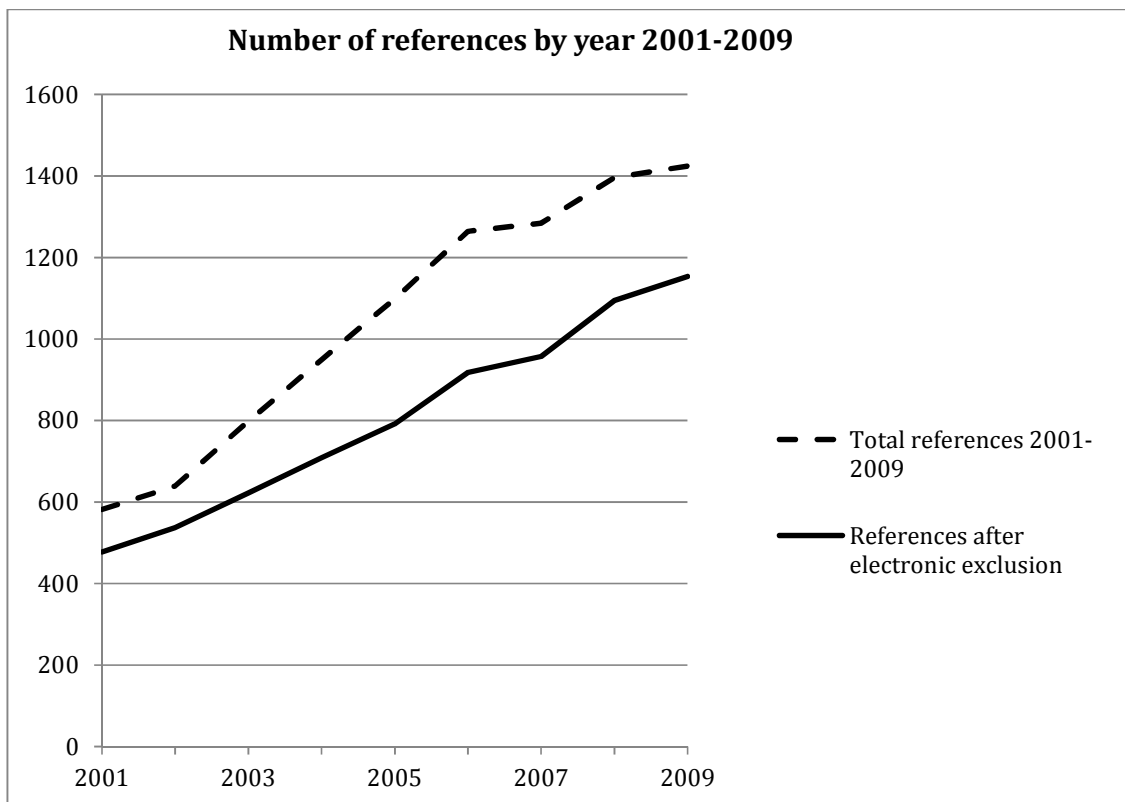

Figure 3 PRISMA Flow diagram for articles 2008-2010

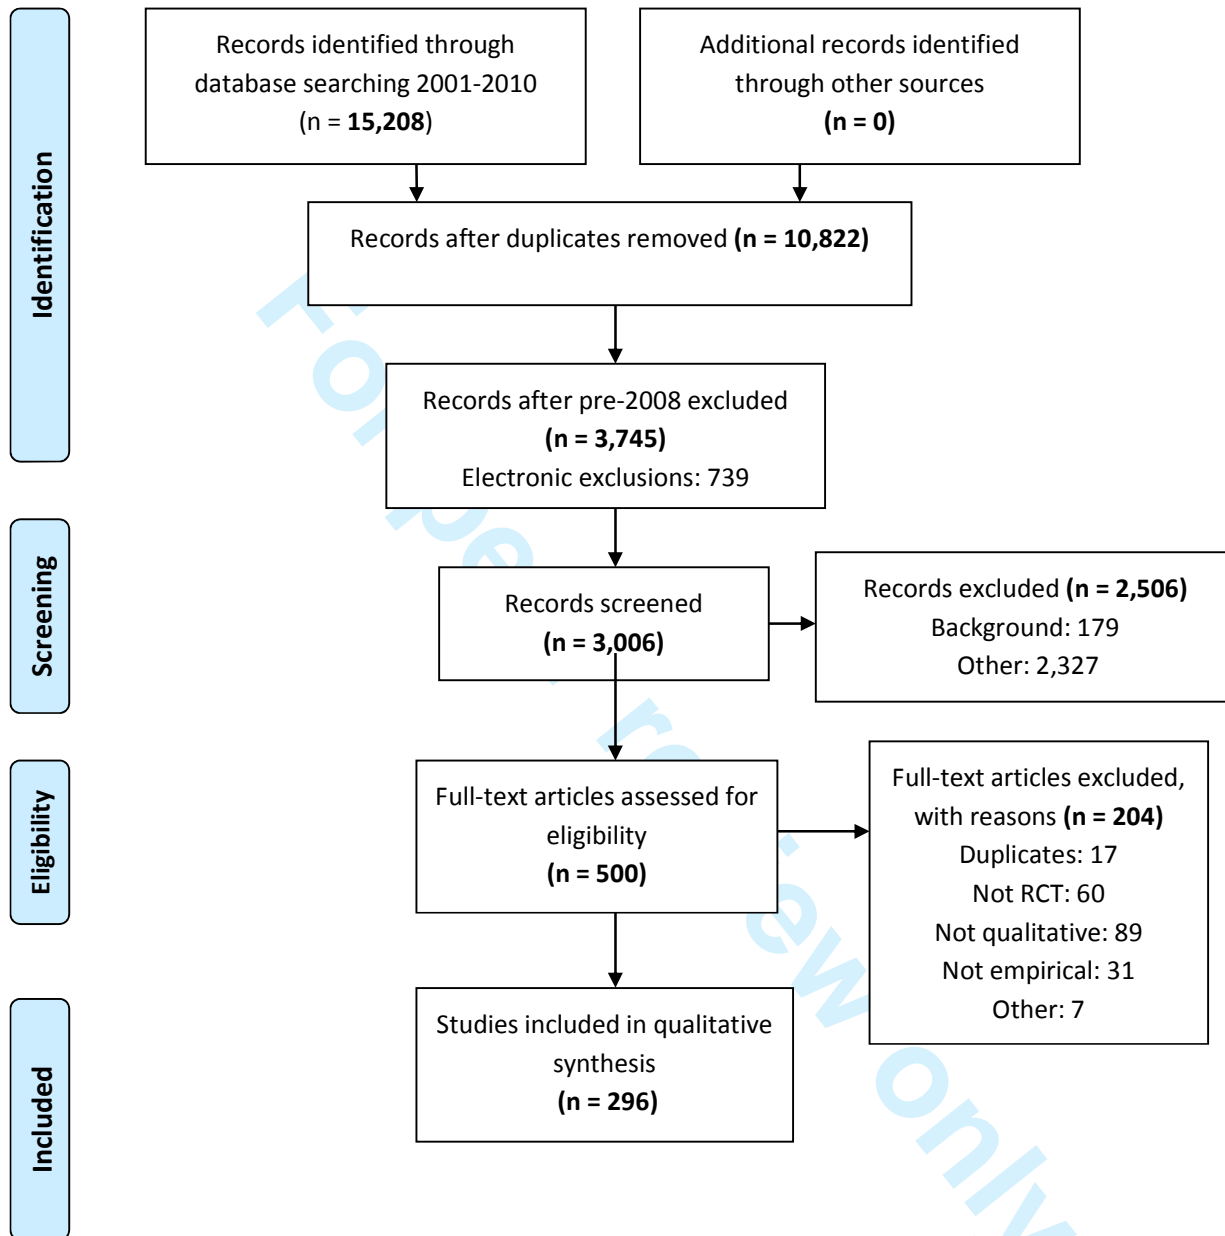

### Framework development

It was not possible to use the temporal framework of before, during and after the trial[7-9] to categorise the qualitative research because it was not possible to distinguish between 'during the trial' and 'after the trial' with any confidence. Authors of articles rarely described when the qualitative data collection or the analysis was undertaken in relation to the availability of the trial findings. We could only report the percentage undertaken before the trial. To develop a new framework, we undertook a process similar to 'framework analysis' for the analysis of qualitative data.[14] As a starting point we read about 100 abstracts and listed the stated aim of the qualitative research within the abstract to identify categories and sub-categories of the focus of the articles. After team discussions we finalised our preliminary framework and one team member (SJD) applied it to the stated aim of the qualitative research in our 500 abstracts, open to emergent categories which were then added to the framework. Then team members selected different categories to lead on and read the full articles within their categories, meeting weekly with the team to discuss exclusions (we excluded another 204 articles at this stage), re-categorisation of articles, added or collapsed categories and sub-categories, and relationships between categories. At this stage we felt that the preliminary categorisation based on the stated aim of the article did not describe the actual focus of the qualitative research. For example, articles which were originally categorised as 'exploring patients' views of the intervention' were put into new categories based on the focus of the qualitative research reported such as 'identifying the perceived value and benefits of the intervention'. Each article was allocated mainly to one sub-category but some were categorised into two or more sub-categories because the qualitative research focused on more than one issue within the article.

### Data extraction

We developed 22 sub-categories and undertook formal data extraction on up to six articles within each sub-category, totalling 104 articles. We extracted descriptive information about country of authors and methods used. During data extraction we identified the value of the qualitative research for generating evidence of effectiveness and documented this. For example, if the focus of the qualitative research was to identify the acceptability of an intervention in principle, then the value might have been that a planned trial was not started, because it became clear that it would have failed to recruit due to patients finding the intervention unacceptable. However, the value of the qualitative research was rarely articulated explicitly by the authors of these articles. We identified potential value based on the framing of the article in the introduction section, issues alluded to in the discussion section, and our own subjective assessment of potential value. We recognise that qualitative research has value in its own right and that we adopted a particular perspective here: the potential value of qualitative research undertaken with trials to the generation of evidence of effectiveness, viewing its utility within an 'enhancement model'. [15] That is, we identified where it enhanced the trial endeavour rather than made an independent contribution to knowledge.

## Results

### Size of the evidence base

We identified 296 articles published between 2008 and September 2010. There was no evidence of increasing numbers per year in this short time period: 113 articles in 2008, 105 in 2009 and 78 in the first nine months of 2010 (equivalent to 104 in a full year). For the 104 articles included in the data extraction, most of the first authors were based in North America (40) and the United Kingdom (30), with others based in Scandinavian countries (9), Australia and New Zealand (9), South Africa (6), and a range of other countries in Africa, Asia and Europe (10).

### Framework of the focus of the qualitative research

The final framework consisted of 22 sub-categories within five broad categories related to different aspects of the trial in terms of the intervention being tested, how the trial was designed and conducted, the outcomes of the trial, outcome and process measures used in the trial, and the health condition the intervention was aimed at (Figure 4).

### Distribution of recent practice

Sometimes articles focused on more than one aspect of the trial, with a total of 356 aspects identified in the 296 articles. The qualitative research in these articles mainly related to the content or delivery of the intervention (Table 1), particularly focusing on the feasibility and acceptability of the intervention in practice. The next largest category was the design and conduct of the trial, particularly focusing on how to improve recruitment and the ethical conduct of trials. Almost one in ten articles focused on the health condition being treated within the trial. Few articles focused on outcomes and measures. This imbalance between categories may reflect practice or may be due to some types of qualitative research undertaken with trials not being published or not being identified by our search strategy. We selected an example of research undertaken in each sub-category, summarised in Table 1. Selection was based on authors being explicit about the impact of the qualitative research on the specific trial if there was an example of this within a sub-category.

### Timing of the qualitative research

28% (82/296) of articles reported qualitative research undertaken at the pre-trial stage, that is, as part of a pilot, feasibility or early phase trial or study in preparation for the main trial (Table 1). Some activities would be expected to occur only prior to the main trial, such as intervention development, and all of these articles were undertaken pre-trial. However, other activities which might also be expected to occur prior to the trial, such as acceptability of the intervention in principle, occurred frequently during the main trial.

**Figure 4 Framework of the focus of qualitative research used with trials**

| Category                            | Sub-category                                                                                                                                                                                                                                                                                                                                                               |
|-------------------------------------|----------------------------------------------------------------------------------------------------------------------------------------------------------------------------------------------------------------------------------------------------------------------------------------------------------------------------------------------------------------------------|
| Intervention content and delivery   | Intervention development<br>Intervention components<br>Models, mechanisms and underlying theory development<br>Perceived value and benefits of intervention<br>Acceptability of intervention in principle<br>Feasibility and acceptability of intervention in practice<br>Fidelity, reach and dose of intervention<br>Implementation of the intervention in the real world |
| Trial design, conduct and processes | Recruitment and retention<br>Diversity of participants<br>Trial participation<br>Acceptability of the trial in principle<br>Acceptability of the trial in practice<br>Ethical conduct of trial<br>Adaptation of trial conduct to local context<br>Impact of trial on staff, researchers or participants                                                                    |
| Outcomes                            | Breadth of outcomes<br>Variation in outcomes                                                                                                                                                                                                                                                                                                                               |
| Measures of process and outcome     | Accuracy of measures<br>Completion of outcome measures<br>Development of outcome measures                                                                                                                                                                                                                                                                                  |
| Target condition                    | Experience of the disease, behaviour or beliefs                                                                                                                                                                                                                                                                                                                            |

1  
2  
3  
4  
5  
6  
7  
8  
9  
10  
11  
12  
13  
14  
15  
16  
17  
18  
19  
20  
21  
22  
23  
24  
25  
26  
27  
28  
29  
30  
31  
32  
33  
34  
35  
36  
37  
38  
39  
40  
41  
42  
43  
44  
45  
46  
47  
48  
49

**Table 1 Description, distribution, timing and examples of different uses of qualitative research with trials**

| Category                          | Sub-category                                         | Description                                                                                                                                | Frequency<br>356 (100%) in 296 articles<br>N (%) | Timing: % of sub-category undertaken at pre-trial stage | Example                                                                                                                                                                                                                                                                                                                                                                                                                                                                                                                                                                        |
|-----------------------------------|------------------------------------------------------|--------------------------------------------------------------------------------------------------------------------------------------------|--------------------------------------------------|---------------------------------------------------------|--------------------------------------------------------------------------------------------------------------------------------------------------------------------------------------------------------------------------------------------------------------------------------------------------------------------------------------------------------------------------------------------------------------------------------------------------------------------------------------------------------------------------------------------------------------------------------|
| Intervention content and delivery | Intervention development                             | Pre-trial development work relating to intervention content and delivery                                                                   | 48 (13%)                                         | 100%                                                    | Gulbrandsen et al (2008) planned to undertake a pragmatic RCT of "Four Habits" a clinical communication tool designed and evaluated in the USA for use in Norway. They used mixed methods research to identify ways to tailor the intervention content to meet the needs of local healthcare practice. They undertook 3 focus groups with local physicians who had been given the intervention training. They confirmed cultural alignment and informed elements of the training programme for use in the planned trial.                                                       |
|                                   | Intervention components                              | Exploring individual components of a complex intervention as delivered in a specific trial                                                 | 10 ( 3%)                                         | 0%                                                      | Romo et al (2009) undertook an RCT of hospital-based heroin prescription compared with methadone prescription for long-term socially-excluded opiate addicts for whom other treatments have failed. The aim of the qualitative research was to explore patients' and relatives' experience of the intervention as delivered within the trial. They undertook in-depth semi-structured interviews with 21 patients receiving the intervention and paired family members. They identified the resulting medicalisation of addiction as a separate component of the intervention. |
|                                   | Models, mechanisms and underlying theory development | Developing models, mechanisms of action and underlying theories or concepts relating to an intervention in the context of a specific trial | 23 ( 6%)                                         | 4%                                                      | Byng et al (2008) as part of a cluster RCT of a multi-faceted facilitation process to improve care of patients with long-term mental illness undertook interviews with 46 practitioners and managers from 12 cluster sites to create 12 case studies. They investigated how a complex intervention led to developments in shared care for people with long-term mental illness. They identified core functions of shared care and developed a theoretical model linking intervention specific, external and generic mechanisms to improved health care.                        |
|                                   | Perceived value and benefits of intervention         | Exploring accounts of perceived value and benefits of intervention given by recipients and providers of the                                | 42 (12%)                                         | 7%                                                      | Dowrick et al (2008) as part of an RCT of reattribution training in general practice for use with patients with medically unexplained symptoms undertook semi-structured interviews with 12 practitioners participating in the trial to explore attitudes to reattribution training amongst practitioners. They identified perceived direct and indirect                                                                                                                                                                                                                       |

1  
2  
3  
4  
5  
6  
7  
8  
9  
10  
11  
12  
13  
14  
15  
16  
17  
18  
19  
20  
21  
22  
23  
24  
25  
26  
27  
28  
29  
30  
31  
32  
33  
34  
35  
36  
37  
38  
39  
40  
41  
42  
43  
44  
45  
46  
47  
48  
49

|  |                                                           |                                                                                                        |          |     |                                                                                                                                                                                                                                                                                                                                                                                                                                                                                                                                                                                                                                                                                                                                                                                                                                                                                                                                                 |
|--|-----------------------------------------------------------|--------------------------------------------------------------------------------------------------------|----------|-----|-------------------------------------------------------------------------------------------------------------------------------------------------------------------------------------------------------------------------------------------------------------------------------------------------------------------------------------------------------------------------------------------------------------------------------------------------------------------------------------------------------------------------------------------------------------------------------------------------------------------------------------------------------------------------------------------------------------------------------------------------------------------------------------------------------------------------------------------------------------------------------------------------------------------------------------------------|
|  |                                                           | intervention                                                                                           |          |     | benefits e.g. increased confidence in working with this group of patients and cross-over into chronic disease management and understanding of what GPs valued about the intervention was seen as a potential mechanism for increasing the successful implementation of the intervention.                                                                                                                                                                                                                                                                                                                                                                                                                                                                                                                                                                                                                                                        |
|  | Acceptability of intervention in principle                | Exploring stakeholder perceptions of the 'in principle' acceptability an intervention                  | 32 ( 9%) | 25% | Zhang et al (2010) undertook a pre-trial study in preparation for a community-based RCT of reduction of risk of diabetes through long-term dietary change from white to brown rice. They undertook a mixed methods study with focus groups of 32 non-trial participants to explore cultural acceptability and prior beliefs about brown rice consumption amongst potential intervention recipients. They identified the beliefs held about brown rice that made it an unacceptable intervention. Results provided valuable insights to guide the design of patient information for the planned trial.                                                                                                                                                                                                                                                                                                                                           |
|  | Feasibility and acceptability of intervention in practice | Exploring stakeholder perceptions of the feasibility and acceptability of an intervention in practice  | 83 (23%) | 24% | Pope et al (2010) as part of a cluster RCT of provider-initiated HIV counselling and testing of tuberculosis patients in South Africa undertook focus groups involving 18 trial intervention providers after the trial results were known to explore the structural and personal factors that might have reduced the acceptability or feasibility of the intervention delivery by the clinic nurses. The RCT showed smaller than expected effect and the qualitative research provided insights into contextual factors that could have reduced the uptake of HIV testing and counselling, including a lack of space and privacy within the clinic itself.                                                                                                                                                                                                                                                                                      |
|  | Fidelity, reach and dose of intervention                  | Describing the fidelity, reach and dose of an intervention as delivered in a specific trial            | 12 ( 3%) | 0%  | Mukoma et al (2009) as part of a schools-based cluster RCT of an HIV education programme to delay onset of sexual intercourse and increase appropriate condom use undertook direct classroom observations (26 in 13 intervention schools), 25 semi-structured interviews with teachers (intervention deliverers) and 12 focus groups with pupils (recipients). They explored whether the intervention was implemented as planned, assessed quality and variation of intervention at a local level, and explored the relationship between fidelity of implementation and observed outcomes. They showed that the intervention was not implemented with high fidelity at many schools, and that the quality of delivery, and therefore the extent to which students were exposed to the intervention (dose), varied considerably. Observation and interview data did not always concur with quantitative assessment of fidelity (teachers' logs). |
|  | Implementation of the intervention in the real world      | Identifying lessons for 'real world' implementation based on delivery of the intervention in the trial | 4 ( 1%)  | 0%  | Carnes et al (2008) as part of an RCT comparing advice to use topical or oral NSAIDs for knee pain in older people undertook telephone interviews with 30 trial participants to explore patient reports of adverse events and expressed preferences for using one mode of analgesia administration over the other. The trial showed equivalence of effect of topical and oral NSAIDs for knee pain. In the light of these findings, the qualitative research provided a model incorporating trial findings and patient preferences into                                                                                                                                                                                                                                                                                                                                                                                                         |

1  
2  
3  
4  
5  
6  
7  
8  
9  
10  
11  
12  
13  
14  
15  
16  
17  
18  
19  
20  
21  
22  
23  
24  
25  
26  
27  
28  
29  
30  
31  
32  
33  
34  
35  
36  
37  
38  
39  
40  
41  
42  
43  
44  
45  
46  
47  
48  
49

|                                     |                                         |                                                                                            |          |     |                                                                                                                                                                                                                                                                                                                                                                                                                                                                                    |
|-------------------------------------|-----------------------------------------|--------------------------------------------------------------------------------------------|----------|-----|------------------------------------------------------------------------------------------------------------------------------------------------------------------------------------------------------------------------------------------------------------------------------------------------------------------------------------------------------------------------------------------------------------------------------------------------------------------------------------|
|                                     |                                         |                                                                                            |          |     | decision-making advice for use in practice, as well as contributed to an empirically-informed lay model for understanding the use of NSAIDs as pain relief.                                                                                                                                                                                                                                                                                                                        |
| Trial design, conduct and processes |                                         |                                                                                            | 54 (15%) |     |                                                                                                                                                                                                                                                                                                                                                                                                                                                                                    |
|                                     | Recruitment and retention               | Identifying ways of increasing recruitment and retention                                   | 11 ( 3%) | 18% | Dormandy et al (2008) as part of a cluster trial of screening for haemoglobinopathies interviewed 20 GPs in the trial to explore why general practices joined the trial and stayed in it. They identified how to overcome barriers to recruitment in future trials in primary care.                                                                                                                                                                                                |
|                                     | Diversity of participants               | Identifying ways of broadening participation in a trial to improve diversity of population | 7 ( 2%)  | 14% | Velott et al (2008) as part of a trial of a community based behavioural intervention in interconceptional women undertook 2 focus groups with 4-6 facilitators and 13 interviews with trial recruitment facilitators to document strategies used and offer perceptions of success of strategies to recruit low income rural participants. They ensured inclusion of a hard to reach group in the trial.                                                                            |
|                                     | Trial participation                     | Improving understanding of how participants join trials and experience of participation    | 4 ( 1%)  | 25% | Kohara & Inoue (2010) as part of a cancer phase I clinical trial of an anticancer drug used qualitative research to reveal the decision making processes of patients participating in or declining a trial. They undertook interviews with 25 people who did and did not participate and observation of six recruitments and identified how recruiters could be more sensitive to patients.                                                                                        |
|                                     | Acceptability of the trial in principle | Exploring stakeholders' views of acceptability of a trial design                           | 5 ( 1%)  | 60% | Campbell et al (2010) in relation to a proposed trial of arthroscopic lavage versus a placebo-surgical procedure for osteoarthritis of the knee undertook focus groups and 21 interviews with health professionals and patients to describe attitudes of stakeholders to a trial. In principle the trial was acceptable but placebo trials were not acceptable to some stakeholders.                                                                                               |
|                                     | Acceptability of the trial in practice  | Exploring stakeholders views of acceptability of a trial design in practice                | 4 ( 1%)  | 25% | Tutton & Gray (2009) as part of a feasibility trial of fluid optimisation after hip fracture undertook two focus groups with 17 staff and an interview with the research nurse to increase knowledge of implementation of the intervention and feasibility of the trial. They identified difficulty recruiting for the trial in a busy healthcare environment.                                                                                                                     |
|                                     | Ethical conduct                         | Strengthening the ethical conduct of a trial, e.g. informed consent procedures             | 16 ( 4%) | 12% | Penn & Evans (2009) as part of a community versus clinic-based antiretroviral medication in a multisite trial in South Africa undertook observation and interviews with 13 recruiters and 19 students going through two different informed consent processes in order to understand the effectiveness of using a modified informed consent process rather than a standard one. They identified ways of improving ethics and reducing anxiety when enrolling people in such trials. |



1  
2  
3  
4  
5  
6  
7  
8  
9  
10  
11  
12  
13  
14  
15  
16  
17  
18  
19  
20  
21  
22  
23  
24  
25  
26  
27  
28  
29  
30  
31  
32  
33  
34  
35  
36  
37  
38  
39  
40  
41  
42  
43  
44  
45  
46  
47  
48  
49

|                                 |                                                       |                                                                              |                     |     |                                                                                                                                                                                                                                                                                                                                                                                                                                                                                                                |
|---------------------------------|-------------------------------------------------------|------------------------------------------------------------------------------|---------------------|-----|----------------------------------------------------------------------------------------------------------------------------------------------------------------------------------------------------------------------------------------------------------------------------------------------------------------------------------------------------------------------------------------------------------------------------------------------------------------------------------------------------------------|
|                                 | Adaptation of trial conduct to local context          | Addressing local issues which may impact on the feasibility of a trial       | 2 ( 1%)             | 50% | Shagi et al (2008) as part of a feasibility study for an efficacy and safety phase III trial of vaginal microbicide undertook participatory action research, including interviews and workshops, to explore the feasibility of a community liaison system. They reported improving the ethical conduct, recruitment and retention for the main trial.                                                                                                                                                          |
|                                 | Impact of trial on staff, researchers or participants | Understanding how the trial affects different stakeholders e.g. workload     | 5 ( 1%)             | 20% | Grbich et al (2008) as part of a factorial cluster trial of different models of palliative care including educational outreach and case conferences undertook qualitative research to explore the effect of the trial on staff. They undertook a longitudinal focus group study (11 in total) with staff delivering the intervention and collecting the data at three time points during the trial. The reported impact on the trial was improved trial procedures and keeping people on board with the trial. |
| Outcomes                        | Breadth of outcomes                                   | Identifies the range of outcomes important to participants in the trial      | 5 ( 1%)<br>1 (<1%)  | 0%  | Alraek & Malterud (2009) as part of a pragmatic RCT of acupuncture to reduce symptoms of the menopause used written answers to an open question on a questionnaire to 127 patients in intervention arm to describe reported changes in health in the acupuncture arm of trial, concluding that the range of outcomes in the trial were not comprehensive.                                                                                                                                                      |
|                                 | Variation in outcomes                                 | Explains differences in outcomes between clusters or participants in a trial | 4 ( 1%)             | 0%  | Hoddinott et al (2010) in a cluster RCT of community breast-feeding support groups to increase breast-feeding rates undertook 64 ethnographic in-depth interviews, 13 focus groups and 17 observations to produce a locality case study for each of 7 intervention clusters. Explained variation in the 7 communities and why rates decreased in some as well as increased in others.                                                                                                                          |
| Measures of process and outcome | Accuracy of measures                                  | Assesses validity of process and outcome measures in the trial               | 10 ( 3%)<br>7 ( 2%) | 43% | Farquhar et al (2010) in a phase II pilot RCT of breathlessness intervention for chronic obstructive pulmonary disease used qualitative research to explore the feasibility of using an outcome measure for the main trial. They used longitudinal interviews with 13 patients in the intervention arm on 51 occasions and recordings of participants completing a questionnaire. They rejected the use of the outcome measure for the main trial due to lack of validity in this patient group.               |
|                                 | Completion of outcome measures                        | Explores why participants complete measures or not                           | 1 (<1%)             | 0%  | Nakash et al (2008) within an RCT of mechanical supports for severe ankle sprains used qualitative research to examine factors affecting response and non-response to a survey measuring outcomes. They undertook interviews with 22 participants, 8 of whom had not responded, and identified reasons for non-response such as not understanding the trial and feeling fully recovered.                                                                                                                       |

1  
2  
3  
4  
5  
6  
7  
8  
9  
10  
11  
12  
13  
14  
15  
16  
17  
18  
19  
20  
21  
22  
23  
24  
25  
26  
27  
28  
29  
30  
31  
32  
33  
34  
35  
36  
37  
38  
39  
40  
41  
42  
43  
44  
45  
46  
47  
48  
49

|                  |                                                 |                                                                                                                               |         |    |                                                                                                                                                                                                                                                                                                                                                                                                                                                            |
|------------------|-------------------------------------------------|-------------------------------------------------------------------------------------------------------------------------------|---------|----|------------------------------------------------------------------------------------------------------------------------------------------------------------------------------------------------------------------------------------------------------------------------------------------------------------------------------------------------------------------------------------------------------------------------------------------------------------|
|                  | Development of outcome measures                 | Contributes to development of new process and secondary outcome measures                                                      | 2 ( 1%) | 0% | Abetz et al (2009) within a double blind placebo RCT of patch treatment in Alzheimer’s disease used qualitative research to identify items for an instrument for use in their RCT and check the acceptability of a developed questionnaire on carer satisfaction. They undertook 3 focus groups with 24 carers prior to the RCT to identify items and 10 cognitive interviews during the RCT to contribute to assessment of the validity of measures used. |
| Target condition | Experience of the disease, behaviour or beliefs | Explores the experience of having or treating a condition that the intervention is aimed at, or a related behaviour or belief | 33 (9%) | 6% | Chew-Graham et al (2009) within a pragmatic RCT of anti-depressants versus counselling for postnatal depression undertook qualitative research to explore patient and health professional views about disclosure of symptoms of postnatal depression. They undertook interviews with 61 staff and patients from both arms of the trial, offering reflections on implications for clinical practice in this patient group.                                  |

Peer review only

### Potential value

We identified the potential value of the qualitative research undertaken within each sub-category (Figure 5). The range of potential values identified was wide, offering a set of rationales for undertaking qualitative research with trials, for example to improve the external validity of a trial by identifying solutions to barriers to recruitment in hard to reach groups, or to facilitate transferability of findings in the real world by exploring contextual issues important to the implementation of the intervention. Qualitative research undertaken at the pre-trial stage has the potential to impact on the main trial as well as future trials. We identified examples of the qualitative research impacting on the main trial e.g. by changing the outcome measure to be used in the main trial. Qualitative research undertaken with the main trial also has the potential to impact on that trial, for example by facilitating interpretation of the trial findings. However, in practice we found few examples of this in the articles. Given that so much of this endeavour occurred at the main trial stage, we mainly identified learning for future trials. We also found that the learning for future trials was not necessarily explicit within the articles.

**Figure 5 Potential value of the qualitative research to the generation of evidence of effectiveness**

|                | Potential value                                                                                                              | Examples                                                                                                                                                                                                                                                                                                                       |
|----------------|------------------------------------------------------------------------------------------------------------------------------|--------------------------------------------------------------------------------------------------------------------------------------------------------------------------------------------------------------------------------------------------------------------------------------------------------------------------------|
| Bias           | Avoids measurement bias                                                                                                      | Helps test face and content validity of instruments in the relevant patient group.                                                                                                                                                                                                                                             |
| Efficiency     | Increases recruitment rate<br><br>Saves money                                                                                | Use of observation and interviews to identify problems with recruitment in a specific trial.<br><br>Stops attempts to undertake full trials of poor or unacceptable interventions, or use unacceptable trial designs.<br><br>Ensures full trials, which can be very expensive, are only undertaken on optimised interventions. |
| Ethics         | Makes trials sensitive to human beings<br><br>Improves informed consent                                                      | Recruitment and communication strategies can pay attention to health professionals and patients so that the experience is positive for them.<br><br>Challenges current assumptions about gold standard informed consent which values information over communication.                                                           |
| Implementation | Facilitates replicability of intervention in the real world<br><br>Facilitates transferability of findings in the real world | Describes components of the intervention so that others can make use of the full intervention in the real world.<br><br>Identifies mechanism of action or contextual issues important for success.                                                                                                                             |
| Interpretation | Explains trial findings                                                                                                      | Explains why trials were null. This may prevent another trial of a similar intervention.<br><br>Contextualises results of successful interventions to support dissemination and transferability in the real world.<br><br>Explains variation in outcomes.                                                                      |
| Relevance      | Ensures interventions meet the needs of health professionals and patients                                                    | Identifies the value of the intervention to important stakeholders.<br><br>Ensures the intervention is contextually or culturally appropriate in different settings.                                                                                                                                                           |
| Success        | Makes a trial successful, feasible, viable                                                                                   | Engenders stakeholder support for the trial.<br><br>Makes a trial locally appropriate to cultural needs.                                                                                                                                                                                                                       |
| Validity       | Improves internal validity<br><br>Improves external validity                                                                 | Ensures right measures are used to measure right outcomes.<br><br>Helps to broaden recruitment to hard to reach groups.                                                                                                                                                                                                        |

## Discussion

### Summary of findings

A large number of journal articles have been published which report the use of qualitative research with trials. This is an international endeavour which is likely to have increased over the past ten years. Researchers have published articles focusing on a wide range of aspects of trials, particularly the intervention and the design and conduct of trials. Most of this research was undertaken with main trials rather than pre-trial where it could have optimised the intervention or trial conduct for the main trial. The potential value of the qualitative research to the endeavour of generating evidence of effectiveness of health interventions was considerable, and included improving the external validity of trials, facilitating interpretation of trial findings, helping trialists to be sensitive to the human beings who participate in trials, and saving money by steering researchers towards interventions more likely to be effective in future trials. However there were indications that researchers were not capitalising on this potential because lessons learnt were for future trials rather than the trial the qualitative research was undertaken with, and these lessons were not always explicitly articulated within these articles.

### Strengths, weaknesses and reflexivity

One strength of the framework developed here is that it was based on published international research which is available to those making use of evidence of effectiveness. The development of the framework was part of a larger study identifying good practice within each sub-category, looking beyond published articles to research proposals and reports, and interviewing researchers who have participated in these studies. The weaknesses are that first, not all qualitative research undertaken with trials is published in peer-reviewed journals[1] and some types may be published more than others. However, the framework was grounded in the research which researchers chose to publish, identifying the issues which they or journals perceived as important. Second, some qualitative research undertaken with trials may not refer to the trial in the qualitative article and therefore may not have been included here. This may have affected some of the sub-categories more than others and thus misrepresented the balance of contributions within the framework. However, if we could not relate an article to a specific trial, then others will also face this barrier, limiting the value of the research for users of evidence of effectiveness. Third, the inclusion criteria relied largely on the abstract and some studies may have been excluded at an early stage which should have been included, resulting in an underestimate of the amount of this research that has been published. Fourth, we acknowledge that the generation of sub-categories was subjective and some of them could have been divided further into another set of sub sub-categories. Another research group may have developed a different framework. Our research group was interested in whether qualitative research undertaken with trials was actually delivering the added-value promised within the literature.[1-4] Finally, the actual impact of this qualitative research on trials may be located in articles reporting the trials, although even studies of all documents and publications of these types of studies found a lack of integration of findings from the trial and qualitative research.[7]

### Context of other research

There was a large overlap between our sub-categories and the items listed in two temporal frameworks.[7,8] However, our framework added a whole category of work around the design and conduct of the trial to one of the existing frameworks.[7] It also showed that the timing of qualitative research in relation to a trial is different in practice from that identified in existing frameworks. For example, both of the temporal frameworks include in the 'after' period the use of qualitative research to explain variation in outcomes yet this qualitative research occurred during the trials in our study.[16] Some of the discussion of the use of qualitative research with trials relates to complex interventions,[1-4] but we found that in practice it was also used with drug trials involving complex patient groups[17] or occurring in complex environments.[18]

Our research highlights the difference between the starting place of qualitative research with trials, which may be general (for example 'to explore the views of those providing and receiving the intervention'), and the focus of a particular publication, which may be more specific (for example where exploration of these views identifies problems with acceptability of the intervention). So researchers may not plan to consider the acceptability of an intervention in principle during the main trial but may find that this emerges as an issue and is extremely important because it explains why the trial failed to recruit or the intervention was ineffective. This learning can offer guidance for future trials of similar families of interventions. However, one can also ask whether enough qualitative research is being undertaken at the pre-trial stage to reduce the chance of finding unwelcome surprises during the main trial. Another study, which had included unpublished qualitative research,[7] found that there was more use of qualitative research before than during the trial so it may be that this work is being undertaken but not being published.

Previous research has shown that most of the trial and qualitative publications had no evidence of integration at the level of interpretation and that few qualitative studies were used to explain the trial findings.[7] Lewin and colleagues identified problems with reporting the qualitative research in that authors could have been more explicit about how qualitative research helped develop the intervention or explained findings. We found examples where researchers were explicit about learning for the trial[16]but the message that emerges from both Lewin et al's research[7] and our own is that this may be something researchers expect to happen more than it actually happens in practice.

Qualitative research undertaken with trials is also relevant to systematic reviews, adding value to systematic reviews rather than simply the specific trial.[19] Noyes and colleagues identify the value of this research in enhancing the relevance and utility of a systematic review of trials to potential research users and in explaining heterogeneity of findings in a review. However they also highlight the problem of retrieving these articles. Our research shows that even when systematic reviewers locate these articles they will have to do the work in terms of thinking about the relevance of these articles to the trial-based evidence, because the authors themselves may not have been explicit about this.

### Implications

Qualitative research can help to optimise interventions and trial procedures, measure the right outcomes in the right way, and understand more about the health condition under study which then feeds back into optimising interventions for that condition. Researchers cannot undertake qualitative research about all these issues for every trial. They may wish to consider problems they think they might face within a particular trial and prioritise the use of qualitative research to address these issues, whilst also staying open to emergency issues. The framework presented here may be productively used by researchers to learn about the range of ways qualitative research can help randomised controlled trials and assist them to report explicitly the implications for future trials or evidence of effectiveness of health interventions so that potential value can be realised. We see this framework as a starting point that hopefully will develop further in the future.

### Conclusions

A large amount of qualitative research undertaken with specific trials has been published, addressing a wide range of aspects of trials, with the potential to improve the endeavour of generating evidence of effectiveness of health interventions. Researchers can increase the impact of this work on trials by undertaking more of it at the pre-trial stage and being explicit within their articles about the learning for trials and evidence-based practice.

### Competing interests

None

### Funding

Medical Research Council reference G0901335. Involvement of funder/sponsor: none.

### Ethics approval

Not required because no humans involved.

### Data sharing

No data to share.

### Copyright

1  
2  
3 The Corresponding Author has the right to grant on behalf of all authors and does grant on behalf of  
4 all authors, an exclusive licence (or non exclusive for government employees) on a worldwide basis  
5 to the BMJ Publishing Group Ltd and its Licensees to permit this article (if accepted) to be published  
6 in BMJ editions and any other BMJ PGL products and sublicences to exploit all subsidiary rights, as set  
7 out in our licence (<http://resources.bmj.com/bmj/authors/checklists-forms/licence-for-publication>).  
8  
9

### 10 11 12 **Contributions**

13  
14 AOC and KJT designed the study. AOC, KJT and JH obtained funding. AOC, KJT, SJD, and AR collected  
15 and analysed data. JH commented on data collection and analysis. AOC wrote the first draft and all  
16 authors contributed to editing the drafts. AOC acts as guarantor of the paper.  
17  
18

### 19 20 21 **References**

- 22  
23 1 Campbell M, Fitzpatrick R, Haines A, Kinmonth AL, Sandercock P, Spiegelhalter D, et al. Framework  
24 for design and evaluation of complex interventions to improve health. *BM J* 2000;**321**:694-696.  
25  
26 2 Campbell N, Murray E, Darbyshire J, Emery J, Farmer A, Griffiths F, et al. Designing and evaluating  
27 complex interventions to improve health care. *BMJ* 2007;**334**:455-459.  
28  
29 3 Craig P, Dieppe P, Macintyre S, Michie S, Nazareth I, Petticrew M. Developing and evaluating  
30 complex interventions: the new Medical Research Council guidance. *BMJ* 2008;**337**:979-983.  
31  
32 4 Oakley A, Strange V, Bonell C, Allen E, Stephenson J, RIPPLE Study Team. Process evaluation in  
33 randomised controlled trials of complex interventions. *BMJ* 2006;**332**:413-6.  
34  
35 5 Bradley F, Wiles R, Kinmonth AL, Mant D, Gantley M. Development and evaluation of complex  
36 interventions in health services research: case study of the Southampton heart integrated care  
37 project (SHIP). *BMJ* 1999;**318**:711-715.  
38  
39 6 Donovan J, Mills N, Smith M, Brindle L, Jacoby A, Peters T, et al. Improving design and conduct of  
40 randomised trials by embedding them in qualitative research: ProtecT (prostate testing for cancer  
41 and treatment) study. *BMJ* 2002;**325**:766-770.  
42  
43 7 Lewin S, Glenton C, Oxman AD. Use of qualitative methods alongside randomised controlled trials  
44 of complex healthcare interventions: methodological study. *BMJ* 2009;**339**:b3496.  
45  
46 8 Creswell JW, Fetters MD, Plano Clark VL, Morales A. Mixed methods intervention trials. In: Andrew  
47 S, Halcomb EJ, eds. *Mixed methods research for nursing and the health sciences*. 2009:161-180.  
48  
49 9 Sandelowski M. Using qualitative methods in interventions studies. *Research in Nursing and Health*  
50 1996;**19**:359-364.  
51  
52 10 Grant MJ, Booth A. A typology of reviews: an analysis of 14 review types and associated  
53 methodologies. *Health Information and Libraries Journal* 2009;**26**:91-108.  
54  
55  
56  
57  
58  
59  
60



1  
2  
3 11 Lefebvre C, Manheimer E, Glanville J. Chapter 6: searching for studies. In: Higgins JPT, Green S,  
4 eds. Cochrane handbook for systematic reviews of interventions. Version 5.0.2 [updated September  
5 2009]. The Cochrane Collaboration, 2009.  
6

7  
8 12 Grant MJ 2000. Searching for qualitative research studies on the Medline database [oral  
9 presentation]. Qualitative Evidence Based Practice Conference; 2000 May 14-16; Coventry University,  
10 UK.  
11

12 13 Lefebvre C, Manheimer E, Glanville J. Chapter 6: Searching for studies. In: Higgins JPT, Green S  
13 (editors). Cochrane Handbook for Systematic Reviews of Interventions. Version 5.0.1 [updated  
14 September 2008]. The Cochrane Collaboration, 2008. Available from [www.cochrane-handbook.org](http://www.cochrane-handbook.org)  
15

16 14 Ritchie J, Spencer L. Qualitative data analysis for applied policy research. In: Bryman A, Burgess  
17 RG, eds. Analysing qualitative data. Routledge 1994:173-194.  
18

19 15 Popay J, Williams G. Qualitative research and evidence-based healthcare. J R Soc Med  
20 1998;Suppl 35:32-37.  
21

22 16 Hoddinott P, Britten J, Prescott GJ, Tappin D, Ludbrook A, Godden DJ. Effectiveness of policy to  
23 provide breastfeeding groups (BIG) for pregnant and breastfeeding mothers in primary care: cluster  
24 randomised controlled trial. BMJ 2009;338:a3026.  
25  
26

27 17 Romo N, Poo M, Ballesta R, the PEPSA team. From illegal poison to legal medicine: A qualitative  
28 research in a heroin-prescription trial in Spain. Drug and Alcohol Review 2009;28:186-195.  
29

30 18 Shagi C, Vallely A, Kasindia S, Chiduoc B, Desmond N, Sotelia S, et al. A model for community  
31 representation and participation in HIV prevention trials among women who engage in transactional  
32 sex in Africa. AIDS Care 2008;20:1039-1049.  
33  
34

35 19 Noyes J, Popay J, Pearson A, Hannes K, Booth A. Chapter 20 Qualitative research and Cochrane  
36 reviews. Cochrane Handbook 2011, [www.cochrane-handbook.org](http://www.cochrane-handbook.org) (accessed 16.5.2011)  
37  
38  
39  
40  
41  
42  
43  
44  
45  
46  
47  
48  
49  
50  
51  
52  
53  
54  
55  
56  
57  
58  
59  
60

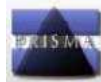

# PRISMA 2009 Checklist

| Section/topic                      | #  | Checklist item                                                                                                                                                                                                                                                                                              | Reported on page # |
|------------------------------------|----|-------------------------------------------------------------------------------------------------------------------------------------------------------------------------------------------------------------------------------------------------------------------------------------------------------------|--------------------|
| <b>TITLE</b>                       |    |                                                                                                                                                                                                                                                                                                             |                    |
| Title                              | 1  | Identify the report as a systematic review, meta-analysis, or both.                                                                                                                                                                                                                                         | 1                  |
| <b>ABSTRACT</b>                    |    |                                                                                                                                                                                                                                                                                                             |                    |
| Structured summary                 | 2  | Provide a structured summary including, as applicable: background; objectives; data sources; study eligibility criteria, participants, and interventions; study appraisal and synthesis methods; results; limitations; conclusions and implications of key findings; systematic review registration number. | 2                  |
| <b>INTRODUCTION</b>                |    |                                                                                                                                                                                                                                                                                                             |                    |
| Rationale                          | 3  | Describe the rationale for the review in the context of what is already known.                                                                                                                                                                                                                              | 3                  |
| Objectives                         | 4  | Provide an explicit statement of questions being addressed with reference to participants, interventions, comparisons, outcomes, and study design (PICOS).                                                                                                                                                  | N/A                |
| <b>METHODS</b>                     |    |                                                                                                                                                                                                                                                                                                             |                    |
| Protocol and registration          | 5  | Indicate if a review protocol exists, if and where it can be accessed (e.g., Web address), and, if available, provide registration information including registration number.                                                                                                                               | Not available      |
| Eligibility criteria               | 6  | Specify study characteristics (e.g., PICOS, length of follow-up) and report characteristics (e.g., years considered, language, publication status) used as criteria for eligibility, giving rationale.                                                                                                      | 6                  |
| Information sources                | 7  | Describe all information sources (e.g., databases with dates of coverage, contact with study authors to identify additional studies) in the search and date last searched.                                                                                                                                  | 4                  |
| Search                             | 8  | Present full electronic search strategy for at least one database, including any limits used, such that it could be repeated.                                                                                                                                                                               | 4-6                |
| Study selection                    | 9  | State the process for selecting studies (i.e., screening, eligibility, included in systematic review, and, if applicable, included in the meta-analysis).                                                                                                                                                   | 6                  |
| Data collection process            | 10 | Describe method of data extraction from reports (e.g., piloted forms, independently, in duplicate) and any processes for obtaining and confirming data from investigators.                                                                                                                                  | 9                  |
| Data items                         | 11 | List and define all variables for which data were sought (e.g., PICOS, funding sources) and any assumptions and simplifications made.                                                                                                                                                                       | 9                  |
| Risk of bias in individual studies | 12 | Describe methods used for assessing risk of bias of individual studies (including specification of whether this was done at the study or outcome level), and how this information is to be used in any data synthesis.                                                                                      | N/A                |
| Summary measures                   | 13 | State the principal summary measures (e.g., risk ratio, difference in means).                                                                                                                                                                                                                               | N/A                |
| Synthesis of results               | 14 | Describe the methods of handling data and combining results of studies, if done, including measures of consistency (e.g., $I^2$ for each meta-analysis)                                                                                                                                                     | N/A                |

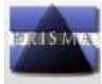

# PRISMA 2009 Checklist

Page 1 of 2

| Section/topic                 | #  | Checklist item                                                                                                                                                                                           | Reported on page # |
|-------------------------------|----|----------------------------------------------------------------------------------------------------------------------------------------------------------------------------------------------------------|--------------------|
| Risk of bias across studies   | 15 | Specify any assessment of risk of bias that may affect the cumulative evidence (e.g., publication bias, selective reporting within studies).                                                             | N/A                |
| Additional analyses           | 16 | Describe methods of additional analyses (e.g., sensitivity or subgroup analyses, meta-regression), if done, indicating which were pre-specified.                                                         | N/A                |
| <b>RESULTS</b>                |    |                                                                                                                                                                                                          |                    |
| Study selection               | 17 | Give numbers of studies screened, assessed for eligibility, and included in the review, with reasons for exclusions at each stage, ideally with a flow diagram.                                          | 8                  |
| Study characteristics         | 18 | For each study, present characteristics for which data were extracted (e.g., study size, PICOS, follow-up period) and provide the citations.                                                             | N/A                |
| Risk of bias within studies   | 19 | Present data on risk of bias of each study and, if available, any outcome level assessment (see item 12).                                                                                                | N/A                |
| Results of individual studies | 20 | For all outcomes considered (benefits or harms), present, for each study: (a) simple summary data for each intervention group (b) effect estimates and confidence intervals, ideally with a forest plot. | N/A                |
| Synthesis of results          | 21 | Present results of each meta-analysis done, including confidence intervals and measures of consistency.                                                                                                  | N/A                |
| Risk of bias across studies   | 22 | Present results of any assessment of risk of bias across studies (see Item 15).                                                                                                                          | N/A                |
| Additional analysis           | 23 | Give results of additional analyses, if done (e.g., sensitivity or subgroup analyses, meta-regression [see Item 16]).                                                                                    | N/A                |
| <b>DISCUSSION</b>             |    |                                                                                                                                                                                                          |                    |
| Summary of evidence           | 24 | Summarize the main findings including the strength of evidence for each main outcome; consider their relevance to key groups (e.g., healthcare providers, users, and policy makers).                     | 19                 |
| Limitations                   | 25 | Discuss limitations at study and outcome level (e.g., risk of bias), and at review-level (e.g., incomplete retrieval of identified research, reporting bias).                                            | 19                 |
| Conclusions                   | 26 | Provide a general interpretation of the results in the context of other evidence, and implications for future research.                                                                                  | 21                 |
| <b>FUNDING</b>                |    |                                                                                                                                                                                                          |                    |
| Funding                       | 27 | Describe sources of funding for the systematic review and other support (e.g., supply of data); role of funders for the systematic review.                                                               | 21                 |

From: Moher D, Liberati A, Tetzlaff J, Altman DG, The PRISMA Group (2009). Preferred Reporting Items for Systematic Reviews and Meta-Analyses: The PRISMA Statement. PLoS Med 6(6): e1000097. doi:10.1371/journal.pmed1000097

For more information, visit: [www.prisma-statement.org](http://www.prisma-statement.org).

Page 2 of 2

For peer review only - <http://bmjopen.bmj.com/site/about/guidelines.xhtml>



## What can qualitative research do for randomised controlled trials? A systematic mapping review

|                                 |                                                                                                                                                                                                                                                                                                                                                                                                                                                                                                                                                                                      |
|---------------------------------|--------------------------------------------------------------------------------------------------------------------------------------------------------------------------------------------------------------------------------------------------------------------------------------------------------------------------------------------------------------------------------------------------------------------------------------------------------------------------------------------------------------------------------------------------------------------------------------|
| Journal:                        | <i>BMJ Open</i>                                                                                                                                                                                                                                                                                                                                                                                                                                                                                                                                                                      |
| Manuscript ID:                  | bmjopen-2013-002889.R1                                                                                                                                                                                                                                                                                                                                                                                                                                                                                                                                                               |
| Article Type:                   | Research                                                                                                                                                                                                                                                                                                                                                                                                                                                                                                                                                                             |
| Date Submitted by the Author:   | 19-Apr-2013                                                                                                                                                                                                                                                                                                                                                                                                                                                                                                                                                                          |
| Complete List of Authors:       | O'Cathain, Alicia; The University of Sheffield, Medical Care Research Unit, School of Health and Related Research (SCHARR)<br>Thomas, Kate; The University of Sheffield, Medical Care Research Unit, School of Health and Related Research (SCHARR)<br>Drabble, Sarah; The University of Sheffield, Medical Care Research Unit, School of Health and Related Research (SCHARR)<br>Rudolph, Anne; The University of Sheffield, Medical Care Research Unit, School of Health and Related Research (SCHARR)<br>Hewison, Jenny; University of Leeds, Psychiatry and Behavioural Sciences |
| <b>Primary Subject Heading</b>: | Research methods                                                                                                                                                                                                                                                                                                                                                                                                                                                                                                                                                                     |
| Secondary Subject Heading:      | Qualitative research, Evidence based practice                                                                                                                                                                                                                                                                                                                                                                                                                                                                                                                                        |
| Keywords:                       | STATISTICS & RESEARCH METHODS, QUALITATIVE RESEARCH, Clinical trials < THERAPEUTICS                                                                                                                                                                                                                                                                                                                                                                                                                                                                                                  |
|                                 |                                                                                                                                                                                                                                                                                                                                                                                                                                                                                                                                                                                      |

SCHOLARONE™  
Manuscripts

only

1  
2  
3 **What can qualitative research do for randomised controlled trials? A systematic mapping review**  
4  
5  
6  
7  
8  
9  
10

11 O’Cathain A, Medical Care Research Unit, School of Health and Related Research (ScHARR),  
12 University of Sheffield, Regent Street, Sheffield S1 4DA, UK, Professor of Health Services Research  
13

14 Thomas KJ, Medical Care Research Unit, School of Health and Related Research (ScHARR), University  
15 of Sheffield, Regent Street, Sheffield S1 4DA, UK, Honorary Professor of Health Services Research  
16

17 Drabble SJ, Medical Care Research Unit, School of Health and Related Research (ScHARR), University  
18 of Sheffield, Regent Street, Sheffield S1 4DA, UK, Research Associate  
19

20 Rudolph A, Medical Care Research Unit, School of Health and Related Research (ScHARR), University  
21 of Sheffield, Regent Street, Sheffield S1 4DA, UK, Research Associate  
22

23 Hewison J, Leeds Institute of Health Sciences, University of Leeds, 101 Clarendon Road, Leeds, LS2  
24 9LJ, Professor of the Psychology of Healthcare  
25  
26  
27  
28  
29  
30  
31  
32  
33  
34  
35  
36  
37

38 Corresponding author:

39 O’Cathain A

40 Medical Care Research Unit

41 School of Health and Related Research (ScHARR)

42 University of Sheffield

43 Regent Street

44 Sheffield S1 4DA

45 UK

46 a.ocathain@sheffield.ac.uk  
47  
48  
49  
50  
51  
52  
53  
54  
55  
56  
57  
58  
59  
60

## ABSTRACT

**Objective** To develop an empirically-based framework of the aspects of randomised controlled trials addressed by qualitative research.

**Design** Systematic mapping review of qualitative research undertaken with randomised controlled trials and published in peer-reviewed journals.

**Data sources** Medline, Premedline, Embase, The Cochrane Library, Health Technology Assessment, PsychINFO, CINAHL, British Nursing Index, Social Sciences Citation Index and ASSIA.

**Eligibility criteria** Articles reporting qualitative research undertaken with trials published between 2008 and September 2010; health research; reported in English.

**Results** 296 articles met the inclusion criteria. Articles focused on 22 aspects of the trial within five broad categories. Some articles focused on more than one aspect of the trial, totalling 356 examples. The qualitative research focused on the intervention being trialled (71%, 254/356); the design, process and conduct of the trial (15%, 54/356); the outcomes of the trial (1%, 5/356); the measures used in the trial (3%, 10/356); and the target condition for the trial (9%, 33/356). A minority of the qualitative research was undertaken at the pre-trial stage (28%, 82/296). The value of the qualitative research to the trial itself was not always made explicit within the articles. The potential value included optimising the intervention and trial conduct, facilitating interpretation of trial findings, helping trialists to be sensitive to the human beings involved in trials, and saving money by steering researchers towards interventions more likely to be effective in future trials.

**Conclusions** A large amount of qualitative research undertaken with specific trials has been published, addressing a wide range of aspects of trials, with the potential to improve the endeavour of generating evidence of effectiveness of health interventions. Researchers can increase the impact of this work on trials by undertaking more of it at the pre-trial stage and being explicit within their articles about the learning for trials and evidence-based practice.

**Key words:** qualitative research, randomised controlled trials

**Word count** 3517

## Article Summary

### Article focus

- Qualitative research is undertaken with randomised controlled trials (RCTs)
- A systematic review of journal articles identified 296 reporting the qualitative research undertaken with trials in 2008-2010
- 22 ways in which qualitative research is used with trials are reported, with examples

### Key messages

- Qualitative research addressed a wide range of aspects of trials focusing on the intervention being trialled (71%); the design, process and conduct of the trial (15%); the outcomes of the trial (1%); the measures used in the trial (3%); and the target condition for the trial (9%)
- A minority of the qualitative research was undertaken at the pre-trial stage (28%, 82/296)
- The value of the qualitative research to the trial itself was not always made explicit within the articles

### Strengths and limitations of this study

- One strength of the framework developed here is that it was based on published international research which is available to those making use of evidence of effectiveness
- One limitation is that not all qualitative research undertaken with trials is published in peer-reviewed journals

## **Background**

Qualitative research is often undertaken with randomised controlled trials (RCTs) to understand the complexity of interventions, and the complexity of the social contexts in which interventions are tested, when generating evidence of effectiveness of treatments and technologies. In the 2000s, the United Kingdom Medical Research Council framework for the development and evaluation of complex interventions highlighted the utility of using a variety of methods at different phases of the evaluation process, including qualitative research.[1-3] For example, qualitative research can be used with randomised controlled trials, either alone or as part of a mixed methods process evaluation, to consider how interventions are delivered in practice.[4] The potential value of understanding how actual implementation differs from planned implementation includes the ability to explain null trial findings or to identify issues important to the transferability of an effective intervention outside experimental conditions. Excellent examples exist of the use of qualitative research with randomised controlled trials which explicitly identify the value of the qualitative research to the trial with which it was undertaken. These include its use in facilitating interpretation of pilot trial findings,[5] and improving the conduct of a feasibility trial by both highlighting reasons for poor recruitment and solutions that increased recruitment.[6] That is, qualitative research is undertaken with randomised controlled trials in order to enhance the evidence of effectiveness produced by the trial or facilitate the feasibility or efficiency of the trial itself.

Researchers have discussed the variety of possible ways in which qualitative research can be used with trials, presenting these within a temporal framework of qualitative research undertaken before, during and after a trial.[7-9] However, qualitative research may be used quite differently in practice and it is important to consider how qualitative research is actually used with trials, as well as its value in terms of contributing to the generation of evidence of effectiveness of treatments and services to improve health and health care. Consideration of how qualitative research is being used can identify ways of improving this endeavour and help future researchers maximise its value. For example, an excellent study of how qualitative research was used with trials of interventions to change professional practice or the organisation of care identified methodological shortcomings of the qualitative research and a lack of integration of findings from the qualitative research and trial.[7] Additionally, systematic organisation of the range of ways researchers use qualitative research with trials, such as the temporal framework, can help to educate researchers new to this endeavour about the possible uses of qualitative research, and help experienced researchers to decide how qualitative research can best be used when designing and undertaking trials. A review of practice also offers an opportunity for the research community to reflect on how they practice this endeavour. Our objective was to develop an empirically-based framework to map the aspects of trials addressed by qualitative research in current international practice, and identify the potential value of this contribution to the generation of evidence of effectiveness of health interventions.

## **Methods**

We undertook a 'systematic mapping review' of published journal articles reporting qualitative research undertaken with specific trials rather than qualitative research undertaken about trials in general. The aim of this type of review, also called a 'mapping review' or 'systematic map', is to map out and categorise existing literature on a particular topic, with further review work expected.[10]



1  
2  
3 Formal quality appraisal is not expected and synthesis is graphical or tabular. This mapping review  
4 involved a systematic search for published articles of qualitative research undertaken with trials. The  
5 aim was not to synthesise the findings from these articles but to categorise them into an inductively  
6 developed framework.  
7  
8  
9

### 10 11 The search strategy

12  
13 We searched the following databases for articles published between 2001 and September 2010:  
14 Medline, Premedline, Embase, The Cochrane Library, Health Technology Assessment, PsychINFO,  
15 CINAHL, British Nursing Index, Social Sciences Citation Index and ASSIA. We used two sets of search  
16 terms to identify articles using qualitative research in the context of a specific trial. We adapted the  
17 Cochrane Highly Sensitive Search Strategy for identifying randomised trials in Medline.[11] The  
18 search terms for qualitative research were more challenging. We started with a qualitative research  
19 filter,[12] but this returned many articles which were not relevant to our study. We made decisions  
20 about the terms to use for the final search in an iterative manner, balancing the need for  
21 comprehensiveness and relevance.[13] (see Appendix 1 for search terms). We identified 15208  
22 references, reduced to 10822 after electronic removal of duplicates. We downloaded these  
23 references to a reference management software programme (EndNote X5).  
24  
25  
26

### 27 Inclusion and exclusion criteria

28  
29 Our inclusion criteria were articles published in English between 2001 and September 2010,  
30 reporting the findings of empirical qualitative research studies undertaken before, during or after a  
31 specific randomised controlled trial in the field of health. These could include qualitative research  
32 published as a standalone article or reported within a mixed methods article. We undertook the  
33 search in October 2010 and searched up to September 2010 which was the last month of  
34 publications available. Our exclusion criteria were that an article was not a journal article (e.g.  
35 conference proceedings, book chapter); no abstract available; not a specific trial (e.g. qualitative  
36 research about hypothetical trials or trials in general); not qualitative research (qualitative data  
37 collection and analysis were required for inclusion); not health (e.g. education); not a report of  
38 findings of empirical research (e.g. published protocol, methodological paper, editorial); not  
39 reported in English; and not human research.  
40  
41  
42  
43  
44

### 45 Screening references and abstracts

46  
47 We applied the exclusion criteria electronically to the 10822 references and abstracts by searching  
48 for terms using Endnote. The numbers of references we identified increased steadily between 2001  
49 and 2009 (Figure 1). The year 2010 is not reported in Figure 1 because we did not search the full  
50 year. Due to the large number of references identified, and the need to read abstracts and full  
51 articles for further selection and categorisation, we made the decision to focus on articles published  
52 between January 2008 and September 2010. In this shorter time period there were 3745 references  
53 and abstracts, with 739 of these excluded by electronic application of exclusion criteria. One of the  
54 research team (SJD) read the abstracts of the remaining 3006 references and excluded a further  
55 2,506. A sample of 100 exclusions was checked by AOC and KJT and there was full agreement with  
56  
57  
58  
59  
60

1  
2  
3 exclusion decisions made by SJD. The most common reasons for exclusion were that the abstract did  
4 not refer to an RCT, did not use qualitative research or did not report empirical research (Figure 2).  
5 500 abstracts remained after this screening process.  
6  
7  
8  
9  
10  
11  
12  
13  
14  
15  
16  
17  
18  
19  
20  
21  
22  
23  
24  
25  
26  
27  
28  
29  
30  
31  
32  
33  
34  
35  
36  
37  
38  
39  
40  
41  
42  
43  
44  
45  
46  
47  
48  
49  
50  
51  
52  
53  
54  
55  
56  
57  
58  
59  
60

For peer review only

1  
2  
3  
4  
5  
6  
7  
8  
9  
10  
11  
12  
13  
14  
15  
16  
17  
18  
19  
20  
21  
22  
23  
24  
25  
26  
27  
28  
29  
30  
31  
32  
33  
34  
35  
36  
37  
38  
39  
40  
41  
42  
43  
44  
45  
46  
47  
48  
49  
50  
51  
52  
53  
54  
55  
56  
57  
58  
59  
60

Figure 2 PRISMA Flow diagram for articles 2008-2010

For peer review only

### Framework development

It was not possible to use the temporal framework of before, during and after the trial[7-9] to categorise the qualitative research because it was not possible to distinguish between 'during the trial' and 'after the trial' with any confidence. Authors of articles rarely described when the qualitative data collection or the analysis was undertaken in relation to the availability of the trial findings. We could only report the percentage undertaken before the trial. To develop a new framework, we undertook a process similar to 'framework analysis' for the analysis of qualitative data.[14] As a starting point we read about 100 abstracts and listed the stated aim of the qualitative research within the abstract to identify categories and sub-categories of the focus of the articles. After team discussions we finalised our preliminary framework and one team member (SJD) applied it to the stated aim of the qualitative research in our 500 abstracts, open to emergent categories which were then added to the framework. Then team members selected different categories to lead on and read the full articles within their categories, meeting weekly with the team to discuss exclusions (we excluded another 204 articles at this stage), re-categorisation of articles, added or collapsed categories and sub-categories, and relationships between categories. At this stage we felt that the preliminary categorisation based on the stated aim of the article did not describe the actual focus of the qualitative research. For example, articles which were originally categorised as 'exploring patients' views of the intervention' were put into new categories based on the focus of the qualitative research reported such as 'identifying the perceived value and benefits of the intervention'. Each article was allocated mainly to one sub-category but some were categorised into two or more sub-categories because the qualitative research focused on more than one issue within the article.

### Data extraction

We developed 22 sub-categories from reading the 296 abstracts and articles. We extracted descriptive data on all 296 articles, including country of first author and qualitative research undertaken prior to the trial. We undertook further detailed data extraction on up to six articles within each sub-category, totalling 104 articles. These articles were selected randomly for most sub-categories, although in the large intervention sub-categories we selected six which showed the diversity of content of the sub-category. We extracted further descriptive information about the methods used. During data extraction we identified the value of the qualitative research for generating evidence of effectiveness and documented this. For example, if the focus of the qualitative research was to identify the acceptability of an intervention in principle, then the value might have been that a planned trial was not started, because it became clear that it would have failed to recruit due to patients finding the intervention unacceptable. However, the value of the qualitative research was rarely articulated explicitly by the authors of these articles. We identified potential value based on the framing of the article in the introduction section, issues alluded to in the discussion section, and our own subjective assessment of potential value. We recognise that qualitative research has value in its own right and that we adopted a particular perspective here: the potential value of qualitative research undertaken with trials to the generation of evidence of effectiveness, viewing its utility within an 'enhancement model'. [15] That is, we identified where it enhanced the trial endeavour rather than made an independent contribution to knowledge.

1  
2  
3  
4  
5 The process was time consuming and resource intensive. It took 30 months from testing search  
6 terms to completion of analysis and write-up as part of a wider study which included interviews with  
7 researchers, surveys of lead investigators and a document review.  
8  
9

## 10 11 **Results**

### 12 Size of the evidence base

13  
14 We identified 296 articles published between 2008 and September 2010. There was no evidence of  
15 increasing numbers per year in this short time period: 113 articles in 2008, 105 in 2009 and 78 in the  
16 first nine months of 2010 (equivalent to 104 in a full year). For the 104 articles included in the data  
17 extraction, most of the first authors were based in North America (40) and the United Kingdom (30),  
18 with others based in Scandinavian countries (9), Australia and New Zealand (9), South Africa (6), and  
19 a range of other countries in Africa, Asia and Europe (10).  
20  
21  
22  
23  
24  
25

### 26 Framework of the focus of the qualitative research

27  
28 The final framework consisted of 22 sub-categories within five broad categories related to different  
29 aspects of the trial in terms of the intervention being tested, how the trial was designed and  
30 conducted, the outcomes of the trial, outcome and process measures used in the trial, and the  
31 health condition the intervention was aimed at (Figure 3).  
32  
33  
34  
35

### 36 Distribution of recent practice

37  
38 Sometimes articles focused on more than one aspect of the trial, with a total of 356 aspects  
39 identified in the 296 articles. The qualitative research in these articles mainly related to the content  
40 or delivery of the intervention (Table 1), particularly focusing on the feasibility and acceptability of  
41 the intervention in practice. The next largest category was the design and conduct of the trial,  
42 particularly focusing on how to improve recruitment and the ethical conduct of trials. Almost one in  
43 ten articles focused on the health condition being treated within the trial. Few articles focused on  
44 outcomes and measures. This imbalance between categories may reflect practice or may be due to  
45 some types of qualitative research undertaken with trials not being published or not being identified  
46 by our search strategy. We selected an example of research undertaken in each sub-category,  
47 summarised in Table 1. Selection was based on authors being explicit about the impact of the  
48 qualitative research on the specific trial if there was an example of this within a sub-category.  
49  
50  
51  
52  
53  
54

### 55 Timing of the qualitative research

56  
57 28% (82/296) of articles reported qualitative research undertaken at the pre-trial stage, that is, as  
58 part of a pilot, feasibility or early phase trial or study in preparation for the main trial (Table 1). Some  
59  
60

1  
2  
3 activities would be expected to occur only prior to the main trial, such as intervention development,  
4 and all of these activities were undertaken pre-trial. However, other activities which might also be  
5 expected to occur prior to the trial, such as acceptability of the intervention in principle, occurred  
6 frequently during the main trial.  
7  
8  
9  
10  
11  
12  
13  
14  
15  
16  
17  
18  
19  
20  
21  
22  
23  
24  
25  
26  
27  
28  
29  
30  
31  
32  
33  
34  
35  
36  
37  
38  
39  
40  
41  
42  
43  
44  
45  
46  
47  
48  
49  
50  
51  
52  
53  
54  
55  
56  
57  
58  
59  
60

For peer review only

1  
2  
3  
4  
5  
6  
7  
8  
9  
10  
11  
12  
13  
14  
15  
16  
17  
18  
19  
20  
21  
22  
23  
24  
25  
26  
27  
28  
29  
30  
31  
32  
33  
34  
35  
36  
37  
38  
39  
40  
41  
42  
43  
44  
45  
46  
47  
48  
49  
50  
51  
52  
53  
54  
55  
56  
57  
58  
59  
60

For peer review only

**Table 1 Description, distribution, timing and examples of different uses of qualitative research with trials**

| Category                                | Sub-category                                                     | Description                                                                                                                                                  | Frequency<br>356 (100%) in 296<br>articles<br>N (%) | Timing: % of<br>sub-<br>category<br>undertaken<br>at pre-trial<br>stage | Example                                                                                                                                                                                                                                                                                                                                                                                                                                                                                                                                                                        |
|-----------------------------------------|------------------------------------------------------------------|--------------------------------------------------------------------------------------------------------------------------------------------------------------|-----------------------------------------------------|-------------------------------------------------------------------------|--------------------------------------------------------------------------------------------------------------------------------------------------------------------------------------------------------------------------------------------------------------------------------------------------------------------------------------------------------------------------------------------------------------------------------------------------------------------------------------------------------------------------------------------------------------------------------|
| Intervention<br>content and<br>delivery | Intervention<br>development                                      | Pre-trial development<br>work relating to<br>intervention content<br>and delivery                                                                            | 48 (13%)                                            | 100%                                                                    | Gulbrandsen et al (2008) planned to undertake a pragmatic RCT of "Four Habits" a clinical communication tool designed and evaluated in the USA for use in Norway. They used mixed methods research to identify ways to tailor the intervention content to meet the needs of local healthcare practice. They undertook 3 focus groups with local physicians who had been given the intervention training. They confirmed cultural alignment and informed elements of the training programme for use in the planned trial.                                                       |
|                                         | Intervention<br>components                                       | Exploring individual<br>components of a<br>complex intervention<br>as delivered in a<br>specific trial                                                       | 10 ( 3%)                                            | 0%                                                                      | Romo et al (2009) undertook an RCT of hospital-based heroin prescription compared with methadone prescription for long-term socially-excluded opiate addicts for whom other treatments have failed. The aim of the qualitative research was to explore patients' and relatives' experience of the intervention as delivered within the trial. They undertook in-depth semi-structured interviews with 21 patients receiving the intervention and paired family members. They identified the resulting medicalisation of addiction as a separate component of the intervention. |
|                                         | Models,<br>mechanisms<br>and underlying<br>theory<br>development | Developing models,<br>mechanisms of action<br>and underlying theories<br>or concepts relating to<br>an intervention in the<br>context of a specific<br>trial | 23 ( 6%)                                            | 4%                                                                      | Byng et al (2008) as part of a cluster RCT of a multi-faceted facilitation process to improve care of patients with long-term mental illness undertook interviews with 46 practitioners and managers from 12 cluster sites to create 12 case studies. They investigated how a complex intervention led to developments in shared care for people with long-term mental illness. They identified core functions of shared care and developed a theoretical model linking intervention specific, external and generic mechanisms to improved health care.                        |
|                                         | Perceived value<br>and benefits of<br>intervention               | Exploring accounts of<br>perceived value and<br>benefits of intervention<br>given by recipients and<br>providers of the                                      | 42 (12%)                                            | 7%                                                                      | Dowrick et al (2008) as part of an RCT of reattribution training in general practice for use with patients with medically unexplained symptoms undertook semi-structured interviews with 12 practitioners participating in the trial to explore attitudes to reattribution training amongst practitioners. They identified perceived direct and indirect                                                                                                                                                                                                                       |



|  |                                                           |                                                                                                        |          |     |                                                                                                                                                                                                                                                                                                                                                                                                                                                                                                                                                                                                                                                                                                                                                                                                                                                                                                                                                 |
|--|-----------------------------------------------------------|--------------------------------------------------------------------------------------------------------|----------|-----|-------------------------------------------------------------------------------------------------------------------------------------------------------------------------------------------------------------------------------------------------------------------------------------------------------------------------------------------------------------------------------------------------------------------------------------------------------------------------------------------------------------------------------------------------------------------------------------------------------------------------------------------------------------------------------------------------------------------------------------------------------------------------------------------------------------------------------------------------------------------------------------------------------------------------------------------------|
|  |                                                           | intervention                                                                                           |          |     | benefits e.g. increased confidence in working with this group of patients and cross-over into chronic disease management and understanding of what GPs valued about the intervention was seen as a potential mechanism for increasing the successful implementation of the intervention.                                                                                                                                                                                                                                                                                                                                                                                                                                                                                                                                                                                                                                                        |
|  | Acceptability of intervention in principle                | Exploring stakeholder perceptions of the 'in principle' acceptability an intervention                  | 32 ( 9%) | 25% | Zhang et al (2010) undertook a pre-trial study in preparation for a community-based RCT of reduction of risk of diabetes through long-term dietary change from white to brown rice. They undertook a mixed methods study with focus groups of 32 non-trial participants to explore cultural acceptability and prior beliefs about brown rice consumption amongst potential intervention recipients. They identified the beliefs held about brown rice that made it an unacceptable intervention. Results provided valuable insights to guide the design of patient information for the planned trial.                                                                                                                                                                                                                                                                                                                                           |
|  | Feasibility and acceptability of intervention in practice | Exploring stakeholder perceptions of the feasibility and acceptability of an intervention in practice  | 83 (23%) | 24% | Pope et al (2010) as part of a cluster RCT of provider-initiated HIV counselling and testing of tuberculosis patients in South Africa undertook focus groups involving 18 trial intervention providers after the trial results were known to explore the structural and personal factors that might have reduced the acceptability or feasibility of the intervention delivery by the clinic nurses. The RCT showed smaller than expected effect and the qualitative research provided insights into contextual factors that could have reduced the uptake of HIV testing and counselling, including a lack of space and privacy within the clinic itself.                                                                                                                                                                                                                                                                                      |
|  | Fidelity, reach and dose of intervention                  | Describing the fidelity, reach and dose of an intervention as delivered in a specific trial            | 12 ( 3%) | 0%  | Mukoma et al (2009) as part of a schools-based cluster RCT of an HIV education programme to delay onset of sexual intercourse and increase appropriate condom use undertook direct classroom observations (26 in 13 intervention schools), 25 semi-structured interviews with teachers (intervention deliverers) and 12 focus groups with pupils (recipients). They explored whether the intervention was implemented as planned, assessed quality and variation of intervention at a local level, and explored the relationship between fidelity of implementation and observed outcomes. They showed that the intervention was not implemented with high fidelity at many schools, and that the quality of delivery, and therefore the extent to which students were exposed to the intervention (dose), varied considerably. Observation and interview data did not always concur with quantitative assessment of fidelity (teachers' logs). |
|  | Implementation of the intervention in the real world      | Identifying lessons for 'real world' implementation based on delivery of the intervention in the trial | 4 ( 1%)  | 0%  | Carnes et al (2008) as part of an RCT comparing advice to use topical or oral NSAIDs for knee pain in older people undertook telephone interviews with 30 trial participants to explore patient reports of adverse events and expressed preferences for using one mode of analgesia administration over the other. The trial showed equivalence of effect of topical and oral NSAIDs for knee pain. In the light of these findings, the qualitative research provided a model incorporating trial findings and patient preferences into                                                                                                                                                                                                                                                                                                                                                                                                         |

1  
2  
3  
4  
5  
6  
7  
8  
9  
10  
11  
12  
13  
14  
15  
16  
17  
18  
19  
20  
21  
22  
23  
24  
25  
26  
27  
28  
29  
30  
31  
32  
33  
34  
35  
36  
37  
38  
39  
40  
41  
42  
43  
44  
45  
46  
47  
48  
49

|                                     |                                         |                                                                                            |                      |     |                                                                                                                                                                                                                                                                                                                                                                                                                                                                                    |
|-------------------------------------|-----------------------------------------|--------------------------------------------------------------------------------------------|----------------------|-----|------------------------------------------------------------------------------------------------------------------------------------------------------------------------------------------------------------------------------------------------------------------------------------------------------------------------------------------------------------------------------------------------------------------------------------------------------------------------------------|
|                                     |                                         |                                                                                            |                      |     | decision-making advice for use in practice, as well as contributed to an empirically-informed lay model for understanding the use of NSAIDs as pain relief.                                                                                                                                                                                                                                                                                                                        |
| Trial design, conduct and processes | Recruitment and retention               | Identifying ways of increasing recruitment and retention                                   | 54 (15%)<br>11 ( 3%) | 18% | Dormandy et al (2008) as part of a cluster trial of screening for haemoglobinopathies interviewed 20 GPs in the trial to explore why general practices joined the trial and stayed in it. They identified how to overcome barriers to recruitment in future trials in primary care.                                                                                                                                                                                                |
|                                     | Diversity of participants               | Identifying ways of broadening participation in a trial to improve diversity of population | 7 ( 2%)              | 14% | Velott et al (2008) as part of a trial of a community based behavioural intervention in interconceptional women undertook 2 focus groups with 4-6 facilitators and 13 interviews with trial recruitment facilitators to document strategies used and offer perceptions of success of strategies to recruit low income rural participants. They ensured inclusion of a hard to reach group in the trial.                                                                            |
|                                     | Trial participation                     | Improving understanding of how participants join trials and experience of participation    | 4 ( 1%)              | 25% | Kohara & Inoue (2010) as part of a cancer phase I clinical trial of an anticancer drug used qualitative research to reveal the decision making processes of patients participating in or declining a trial. They undertook interviews with 25 people who did and did not participate and observation of six recruitments and identified how recruiters could be more sensitive to patients.                                                                                        |
|                                     | Acceptability of the trial in principle | Exploring stakeholders' views of acceptability of a trial design                           | 5 ( 1%)              | 60% | Campbell et al (2010) in relation to a proposed trial of arthroscopic lavage versus a placebo-surgical procedure for osteoarthritis of the knee undertook focus groups and 21 interviews with health professionals and patients to describe attitudes of stakeholders to a trial. In principle the trial was acceptable but placebo trials were not acceptable to some stakeholders.                                                                                               |
|                                     | Acceptability of the trial in practice  | Exploring stakeholders views of acceptability of a trial design in practice                | 4 ( 1%)              | 25% | Tutton & Gray (2009) as part of a feasibility trial of fluid optimisation after hip fracture undertook two focus groups with 17 staff and an interview with the research nurse to increase knowledge of implementation of the intervention and feasibility of the trial. They identified difficulty recruiting for the trial in a busy healthcare environment.                                                                                                                     |
|                                     | Ethical conduct                         | Strengthening the ethical conduct of a trial, e.g. informed consent procedures             | 16 ( 4%)             | 12% | Penn & Evans (2009) as part of a community versus clinic-based antiretroviral medication in a multisite trial in South Africa undertook observation and interviews with 13 recruiters and 19 students going through two different informed consent processes in order to understand the effectiveness of using a modified informed consent process rather than a standard one. They identified ways of improving ethics and reducing anxiety when enrolling people in such trials. |

|                                 |                                                       |                                                                              |                     |     |                                                                                                                                                                                                                                                                                                                                                                                                                                                                                                                |
|---------------------------------|-------------------------------------------------------|------------------------------------------------------------------------------|---------------------|-----|----------------------------------------------------------------------------------------------------------------------------------------------------------------------------------------------------------------------------------------------------------------------------------------------------------------------------------------------------------------------------------------------------------------------------------------------------------------------------------------------------------------|
|                                 | Adaptation of trial conduct to local context          | Addressing local issues which may impact on the feasibility of a trial       | 2 ( 1%)             | 50% | Shagi et al (2008) as part of a feasibility study for an efficacy and safety phase III trial of vaginal microbicide undertook participatory action research, including interviews and workshops, to explore the feasibility of a community liaison system. They reported improving the ethical conduct, recruitment and retention for the main trial.                                                                                                                                                          |
|                                 | Impact of trial on staff, researchers or participants | Understanding how the trial affects different stakeholders e.g. workload     | 5 ( 1%)             | 20% | Grbich et al (2008) as part of a factorial cluster trial of different models of palliative care including educational outreach and case conferences undertook qualitative research to explore the effect of the trial on staff. They undertook a longitudinal focus group study (11 in total) with staff delivering the intervention and collecting the data at three time points during the trial. The reported impact on the trial was improved trial procedures and keeping people on board with the trial. |
| Outcomes                        | Breadth of outcomes                                   | Identifies the range of outcomes important to participants in the trial      | 5 ( 1%)<br>1 (<1%)  | 0%  | Alraek & Malterud (2009) as part of a pragmatic RCT of acupuncture to reduce symptoms of the menopause used written answers to an open question on a questionnaire to 127 patients in intervention arm to describe reported changes in health in the acupuncture arm of trial, concluding that the range of outcomes in the trial were not comprehensive.                                                                                                                                                      |
|                                 | Variation in outcomes                                 | Explains differences in outcomes between clusters or participants in a trial | 4 ( 1%)             | 0%  | Hoddinott et al (2010) in a cluster RCT of community breast-feeding support groups to increase breast-feeding rates undertook 64 ethnographic in-depth interviews, 13 focus groups and 17 observations to produce a locality case study for each of 7 intervention clusters. Explained variation in the 7 communities and why rates decreased in some as well as increased in others.                                                                                                                          |
| Measures of process and outcome | Accuracy of measures                                  | Assesses validity of process and outcome measures in the trial               | 10 ( 3%)<br>7 ( 2%) | 43% | Farquhar et al (2010) in a phase II pilot RCT of breathlessness intervention for chronic obstructive pulmonary disease used qualitative research to explore the feasibility of using an outcome measure for the main trial. They used longitudinal interviews with 13 patients in the intervention arm on 51 occasions and recordings of participants completing a questionnaire. They rejected the use of the outcome measure for the main trial due to lack of validity in this patient group.               |
|                                 | Completion of outcome measures                        | Explores why participants complete measures or not                           | 1 (<1%)             | 0%  | Nakash et al (2008) within an RCT of mechanical supports for severe ankle sprains used qualitative research to examine factors affecting response and non-response to a survey measuring outcomes. They undertook interviews with 22 participants, 8 of whom had not responded, and identified reasons for non-response such as not understanding the trial and feeling fully recovered.                                                                                                                       |

|                  |                                                 |                                                                                                                               |         |    |                                                                                                                                                                                                                                                                                                                                                                                                                                                            |
|------------------|-------------------------------------------------|-------------------------------------------------------------------------------------------------------------------------------|---------|----|------------------------------------------------------------------------------------------------------------------------------------------------------------------------------------------------------------------------------------------------------------------------------------------------------------------------------------------------------------------------------------------------------------------------------------------------------------|
|                  | Development of outcome measures                 | Contributes to development of new process and secondary outcome measures                                                      | 2 ( 1%) | 0% | Abetz et al (2009) within a double blind placebo RCT of patch treatment in Alzheimer's disease used qualitative research to identify items for an instrument for use in their RCT and check the acceptability of a developed questionnaire on carer satisfaction. They undertook 3 focus groups with 24 carers prior to the RCT to identify items and 10 cognitive interviews during the RCT to contribute to assessment of the validity of measures used. |
| Target condition | Experience of the disease, behaviour or beliefs | Explores the experience of having or treating a condition that the intervention is aimed at, or a related behaviour or belief | 33 (9%) | 6% | Chew-Graham et al (2009) within a pragmatic RCT of anti-depressants versus counselling for postnatal depression undertook qualitative research to explore patient and health professional views about disclosure of symptoms of postnatal depression. They undertook interviews with 61 staff and patients from both arms of the trial, offering reflections on implications for clinical practice in this patient group.                                  |

### Potential value

We identified the potential value of the qualitative research undertaken within each sub-category (Figure 4). The range of potential values identified was wide, offering a set of rationales for undertaking qualitative research with trials, for example to improve the external validity of a trial by identifying solutions to barriers to recruitment in hard to reach groups, or to facilitate transferability of findings in the real world by exploring contextual issues important to the implementation of the intervention. Qualitative research undertaken at the pre-trial stage has the potential to impact on the main trial as well as future trials. We identified examples of the qualitative research impacting on the main trial e.g. by changing the outcome measure to be used in the main trial. Qualitative research undertaken with the main trial also has the potential to impact on that trial, for example by facilitating interpretation of the trial findings. However, in practice we found few examples of this in the articles. Given that so much of this endeavour occurred at the main trial stage, we mainly identified learning for future trials. We also found that the learning for future trials was not necessarily explicit within the articles.

1  
2  
3  
4  
5  
6  
7  
8  
9  
10  
11  
12  
13  
14  
15  
16  
17  
18  
19  
20  
21  
22  
23  
24  
25  
26  
27  
28  
29  
30  
31  
32  
33  
34  
35  
36  
37  
38  
39  
40  
41  
42  
43  
44  
45  
46  
47  
48  
49  
50  
51  
52  
53  
54  
55  
56  
57  
58  
59  
60

For peer review only

## Discussion

### Summary of findings

A large number of journal articles have been published which report the use of qualitative research with trials. This is an international endeavour which is likely to have increased over the past ten years. Researchers have published articles focusing on a wide range of aspects of trials, particularly the intervention and the design and conduct of trials. Most of this research was undertaken with main trials rather than pre-trial where it could have optimised the intervention or trial conduct for the main trial. The potential value of the qualitative research to the endeavour of generating evidence of effectiveness of health interventions was considerable, and included improving the external validity of trials, facilitating interpretation of trial findings, helping trialists to be sensitive to the human beings who participate in trials, and saving money by steering researchers towards interventions more likely to be effective in future trials. However there were indications that researchers were not capitalising on this potential because lessons learnt were for future trials rather than the trial the qualitative research was undertaken with, and these lessons were not always explicitly articulated within these articles so that researchers not involved in the original research project could utilise them.

### Strengths, weaknesses and reflexivity

One strength of the framework developed here is that it was based on published international research which is available to those making use of evidence of effectiveness. The development of the framework was part of a larger study identifying good practice within each sub-category, looking beyond published articles to research proposals and reports, and interviewing researchers who have participated in these studies. The weaknesses are that first, not all qualitative research undertaken with trials is published in peer-reviewed journals[1] and some types may be published more than others. However, the framework was grounded in the research which researchers chose to publish, identifying the issues which they or journals perceived as important. Second, some qualitative research undertaken with trials may not refer to the trial in the qualitative article and therefore may not have been included here. This may have affected some of the sub-categories more than others and thus misrepresented the balance of contributions within the framework. However, if we could not relate an article to a specific trial, then others will also face this barrier, limiting the value of the research for users of evidence of effectiveness. Third, only English language articles were included. Fourth, the inclusion criteria relied largely on the abstract and some studies may have been excluded at an early stage which should have been included, resulting in an underestimate of the amount of this research that has been published. Fifth, we acknowledge that the generation of sub-categories was subjective and some of them could have been divided further into another set of sub sub-categories. Another research group may have developed a different framework. Our research group was interested in whether qualitative research undertaken with trials was actually delivering the added-value promised within the literature.[1-4] Finally, the actual impact of this qualitative research on trials may be located in articles reporting the trials, although even studies of all

1  
2  
3 documents and publications of these types of studies found a lack of integration of findings from the  
4 trial and qualitative research.[7]  
5  
6  
7

### 8 Context of other research 9

10 There was a large overlap between our sub-categories and the items listed in two temporal  
11 frameworks.[7,8] However, our framework added a whole category of work around the design and  
12 conduct of the trial to one of the existing frameworks.[7] It also showed that the timing of  
13 qualitative research in relation to a trial is different in practice from that identified in existing  
14 frameworks. For example, both of the temporal frameworks include in the 'after' period the use of  
15 qualitative research to explain variation in outcomes yet this qualitative research occurred during  
16 the trials in our study.[16] Some of the discussion of the use of qualitative research with trials relates  
17 to complex interventions,[1-4] but we found that in practice it was also used with drug trials  
18 involving complex patient groups[17] or occurring in complex environments.[18]  
19  
20  
21

22 Our research highlights the difference between the starting place of qualitative research with trials,  
23 which may be general (for example 'to explore the views of those providing and receiving the  
24 intervention'), and the focus of a particular publication, which may be more specific (for example  
25 where exploration of these views identifies problems with acceptability of the intervention). So  
26 researchers may not plan to consider the acceptability of an intervention in principle during the  
27 main trial but may find that this emerges as an issue and is extremely important because it explains  
28 why the trial failed to recruit or the intervention was ineffective. This learning can offer guidance for  
29 future trials of similar families of interventions. However, one can also ask whether enough  
30 qualitative research is being undertaken at the pre-trial stage to reduce the chance of finding  
31 unwelcome surprises during the main trial. Another study, which had included unpublished  
32 qualitative research,[7] found that there was more use of qualitative research before than during  
33 the trial so it may be that this work is being undertaken but not being published.  
34  
35  
36  
37

38 Previous research has shown that most of the trial and qualitative publications had no evidence of  
39 integration at the level of interpretation and that few qualitative studies were used to explain the  
40 trial findings.[7] Lewin and colleagues identified problems with reporting the qualitative research in  
41 that authors could have been more explicit about how qualitative research helped develop the  
42 intervention or explained findings. We found examples where researchers were explicit about  
43 learning for the trial[16]but the message that emerges from both Lewin et al's research[7] and our  
44 own is that this may be something researchers expect to happen more than it actually happens in  
45 practice.  
46  
47  
48

49 Qualitative research undertaken with trials is also relevant to systematic reviews, adding value to  
50 systematic reviews rather than simply the specific trial.[19] Noyes and colleagues identify the value  
51 of this research in enhancing the relevance and utility of a systematic review of trials to potential  
52 research users and in explaining heterogeneity of findings in a review. However they also highlight  
53 the problem of retrieving these articles. Our research shows that even when systematic reviewers  
54 locate these articles they will have to do the work in terms of thinking about the relevance of these  
55 articles to the trial-based evidence, because the authors themselves may not have been explicit  
56 about this.  
57  
58  
59  
60



### Implications

Qualitative research can help to optimise interventions and trial procedures, measure the right outcomes in the right way, and understand more about the health condition under study which then feeds back into optimising interventions for that condition. Researchers cannot undertake qualitative research about all these issues for every trial. They may wish to consider problems they think they might face within a particular trial and prioritise the use of qualitative research to address these issues, whilst also staying open to emergent issues. The framework presented here may be productively used by researchers to learn about the range of ways qualitative research can help randomised controlled trials and assist them to report explicitly the implications for future trials or evidence of effectiveness of health interventions so that potential value can be realised. We see this framework as a starting point that hopefully will develop further in the future.

### Conclusions

A large amount of qualitative research undertaken with specific trials has been published, addressing a wide range of aspects of trials, with the potential to improve the endeavour of generating evidence of effectiveness of health interventions. Researchers can increase the impact of this work on trials by undertaking more of it at the pre-trial stage and being explicit within their articles about the learning for trials and evidence-based practice.

### **Figure legends:**

**Figure 1 Numbers of references identified for qualitative research undertaken with RCTs between 2001 and 2009**

**Figure 2 PRISMA Flow diagram for articles 2008-2010**

**Figure 3 Framework of the focus of qualitative research used with trials**

**Figure 4 Potential value of the qualitative research to the generation of evidence of effectiveness**

**Competing interests**

None

**Funding**

Medical Research Council reference G0901335. Involvement of funder/sponsor: none.

**Ethics approval**

Not required because no humans involved.

**Data sharing**

No data to share.

**Copyright**

The Corresponding Author has the right to grant on behalf of all authors and does grant on behalf of all authors, an exclusive licence (or non exclusive for government employees) on a worldwide basis to the BMJ Publishing Group Ltd and its Licensees to permit this article (if accepted) to be published in BMJ editions and any other BMJ PGL products and sublicences to exploit all subsidiary rights, as set out in our licence (<http://resources.bmj.com/bmj/authors/checklists-forms/licence-for-publication>).

**Contributions**

AOC and KJT designed the study. AOC, KJT and JH obtained funding. AOC, KJT, SJD, and AR collected and analysed data. JH commented on data collection and analysis. AOC wrote the first draft and all authors contributed to editing the drafts. AOC acts as guarantor of the paper.

**References**

- 1 Campbell M, Fitzpatrick R, Haines A, et al. Framework for design and evaluation of complex interventions to improve health. *BM J* 2000;**321**:694-696.
- 2 Campbell N, Murray E, Darbyshire J, et al. Designing and evaluating complex interventions to improve health care. *BMJ* 2007;**334**:455-459.
- 3 Craig P, Dieppe P, Macintyre S, et al. Developing and evaluating complex interventions: the new Medical Research Council guidance. *BMJ* 2008;**337**:979-983.

- 1  
2  
3 4 Oakley A, Strange V, Bonell C, et al. Process evaluation in randomised controlled trials of complex  
4 interventions. *BMJ* 2006;**332**:413–6.  
5  
6 5 Bradley F, Wiles R, Kinmonth AL, et al. Development and evaluation of complex interventions in  
7 health services research: case study of the Southampton heart integrated care project (SHIP). *BMJ*  
8 1999;**318**:711-715.  
9  
10 6 Donovan J, Mills N, Smith M, et al. Improving design and conduct of randomised trials by  
11 embedding them in qualitative research: ProtecT (prostate testing for cancer and treatment) study.  
12 *BMJ* 2002;**325**:766-770.  
13  
14 7 Lewin S, Glenton C, Oxman AD. Use of qualitative methods alongside randomised controlled trials  
15 of complex healthcare interventions: methodological study. *BMJ* 2009;**339**:b3496.  
16  
17 8 Creswell JW, Fetters MD, Plano Clark VL, et al. Mixed methods intervention trials. In: Andrew S,  
18 Halcomb EJ, eds. *Mixed methods research for nursing and the health sciences*. 2009:161-180.  
19  
20 9 Sandelowski M. Using qualitative methods in interventions studies. *Research in Nursing and Health*  
21 1996;**19**:359-364.  
22  
23 10 Grant MJ, Booth A. A typology of reviews: an analysis of 14 review types and associated  
24 methodologies. *Health Information and Libraries Journal* 2009;**26**:91–108.  
25  
26 11 Lefebvre C, Manheimer E, Glanville J. Chapter 6: searching for studies. In: Higgins JPT, Green S,  
27 eds. *Cochrane handbook for systematic reviews of interventions*. Version 5.0.2 [updated September  
28 2009]. The Cochrane Collaboration, 2009.  
29  
30 12 Grant MJ 2000. Searching for qualitative research studies on the Medline database [oral  
31 presentation]. *Qualitative Evidence Based Practice Conference*; 2000 May 14-16; Coventry University,  
32 UK.  
33  
34 13 Lefebvre C, Manheimer E, Glanville J. Chapter 6: Searching for studies. In: Higgins JPT, Green S  
35 (editors). *Cochrane Handbook for Systematic Reviews of Interventions*. Version 5.0.1 [updated  
36 September 2008]. The Cochrane Collaboration, 2008. Available from [www.cochrane-handbook.org](http://www.cochrane-handbook.org)  
37  
38 14 Ritchie J, Spencer L. Qualitative data analysis for applied policy research. In: Bryman A, Burgess  
39 RG, eds. *Analysing qualitative data*. Routledge 1994:173-194.  
40  
41 15 Popay J, Williams G. Qualitative research and evidence-based healthcare. *J R Soc Med*  
42 1998;**Suppl 35**:32-37.  
43  
44 16 Hoddinott P, Britten J, Prescott GJ, et al. Effectiveness of policy to provide breastfeeding groups  
45 (BIG) for pregnant and breastfeeding mothers in primary care: cluster randomised controlled trial.  
46 *BMJ* 2009;**338**:a3026.  
47  
48 17 Romo N, Poo M, Ballesta R, the PEPSA team. From illegal poison to legal medicine: A qualitative  
49 research in a heroin-prescription trial in Spain. *Drug and Alcohol Review* 2009;**28**:186–195.  
50  
51  
52  
53  
54  
55  
56  
57  
58  
59  
60

1  
2  
3 18 Shagi C, Vallely A, Kasindia S, et al. A model for community representation and participation in  
4 HIV prevention trials among women who engage in transactional sex in Africa. *AIDS Care*  
5 2008;**20**:1039-1049.  
6

7  
8 19 Noyes J, Popay J, Pearson A, et al. Chapter 20 Qualitative research and Cochrane reviews.  
9 *Cochrane Handbook* 2011, [www.cochrane-handbook.org](http://www.cochrane-handbook.org) (accessed 16.5.2011)  
10  
11  
12  
13  
14  
15  
16  
17  
18  
19  
20  
21  
22  
23  
24  
25  
26  
27  
28  
29  
30  
31  
32  
33  
34  
35  
36  
37  
38  
39  
40  
41  
42  
43  
44  
45  
46  
47  
48  
49  
50  
51  
52  
53  
54  
55  
56  
57  
58  
59  
60

For peer review only

1  
2  
3 **What can qualitative research do for randomised controlled trials? A systematic mapping review**  
4  
5  
6  
7  
8  
9  
10

11 O’Cathain A, Medical Care Research Unit, School of Health and Related Research (ScHARR),  
12 University of Sheffield, Regent Street, Sheffield S1 4DA, UK, Professor of Health Services Research  
13

14 Thomas KJ, Medical Care Research Unit, School of Health and Related Research (ScHARR), University  
15 of Sheffield, Regent Street, Sheffield S1 4DA, UK, Honorary Professor of Health Services Research  
16

17 Drabble SJ, Medical Care Research Unit, School of Health and Related Research (ScHARR), University  
18 of Sheffield, Regent Street, Sheffield S1 4DA, UK, Research Associate  
19

20 Rudolph A, Medical Care Research Unit, School of Health and Related Research (ScHARR), University  
21 of Sheffield, Regent Street, Sheffield S1 4DA, UK, Research Associate  
22

23 Hewison J, Leeds Institute of Health Sciences, University of Leeds, 101 Clarendon Road, Leeds, LS2  
24 9LJ, Professor of the Psychology of Healthcare  
25  
26  
27  
28  
29  
30  
31  
32  
33  
34  
35  
36  
37

38 Corresponding author:

39 O’Cathain A

40 Medical Care Research Unit

41 School of Health and Related Research (ScHARR)

42 University of Sheffield

43 Regent Street

44 Sheffield S1 4DA

45 UK  
46  
47  
48  
49  
50  
51  
52  
53  
54  
55

56 a.ocathain@sheffield.ac.uk  
57  
58  
59  
60

## ABSTRACT

**Objective** To develop an empirically-based framework of the aspects of randomised controlled trials addressed by qualitative research.

**Design** Systematic mapping review of qualitative research undertaken with randomised controlled trials and published in peer-reviewed journals.

**Data sources** Medline, Premedline, Embase, The Cochrane Library, Health Technology Assessment, PsychINFO, CINAHL, British Nursing Index, Social Sciences Citation Index and ASSIA.

**Eligibility criteria** Articles reporting qualitative research undertaken with trials published between 2008 and September 2010; health research; reported in English.

**Results** 296 articles met the inclusion criteria. Articles focused on 22 aspects of the trial within five broad categories. Some articles focused on more than one aspect of the trial, totalling 356 examples. The qualitative research focused on the intervention being trialled (71%, 254/356); the design, process and conduct of the trial (15%, 54/356); the outcomes of the trial (1%, 5/356); the measures used in the trial (3%, 10/356); and the target condition for the trial (9%, 33/356). A minority of the qualitative research was undertaken at the pre-trial stage (28%, 82/296). The value of the qualitative research to the trial itself was not always made explicit within the articles. The potential value included optimising the intervention and trial conduct, facilitating interpretation of trial findings, helping trialists to be sensitive to the human beings involved in trials, and saving money by steering researchers towards interventions more likely to be effective in future trials.

**Conclusions** A large amount of qualitative research undertaken with specific trials has been published, addressing a wide range of aspects of trials, with the potential to improve the endeavour of generating evidence of effectiveness of health interventions. Researchers can increase the impact of this work on trials by undertaking more of it at the pre-trial stage and being explicit within their articles about the learning for trials and evidence-based practice.

**Key words:** qualitative research, randomised controlled trials

**Word count** 3517

**Article focus**

- Qualitative research is undertaken with randomised controlled trials (RCTs)
- A systematic review of journal articles identified 296 reporting the qualitative research undertaken with trials in 2008-2010
- 22 ways in which qualitative research is used with trials are reported, with examples

**Key messages**

- Qualitative research addressed a wide range of aspects of trials focusing on the intervention being trialled (71%); the design, process and conduct of the trial (15%); the outcomes of the trial (1%); the measures used in the trial (3%); and the target condition for the trial (9%)
- A minority of the qualitative research was undertaken at the pre-trial stage (28%, 82/296)
- The value of the qualitative research to the trial itself was not always made explicit within the articles

**Strengths and limitations of this study**

- One strength of the framework developed here is that it was based on published international research which is available to those making use of evidence of effectiveness
- One limitation is that not all qualitative research undertaken with trials is published in peer-reviewed journals

## **Background**

Qualitative research is often undertaken with randomised controlled trials (RCTs) to understand the complexity of interventions, and the complexity of the social contexts in which interventions are tested, when generating evidence of effectiveness of treatments and technologies. In the 2000s, the [United Kingdom](#) Medical Research Council framework for the development and evaluation of complex interventions highlighted the utility of using a variety of methods at different phases of the evaluation process, including qualitative research.[1-3] For example, qualitative research can be used with randomised controlled trials, either alone or as part of a mixed methods process evaluation, to consider how interventions are delivered in practice.[4] The potential value of understanding how actual implementation differs from planned implementation includes the ability to explain null trial findings or to identify issues important to the transferability of an effective intervention outside experimental conditions. Excellent examples exist of the use of qualitative research with randomised controlled trials which explicitly identify the value of the qualitative research to the trial with which it was undertaken. These include its use in facilitating interpretation of pilot trial findings,[5] and improving the conduct of a feasibility trial by both highlighting reasons for poor recruitment and solutions that increased recruitment.[6] That is, qualitative research is undertaken with randomised controlled trials in order to enhance the evidence of effectiveness produced by the trial or facilitate the feasibility or efficiency of the trial itself.

Researchers have discussed the variety of possible ways in which qualitative research can be used with trials, presenting these within a temporal framework of qualitative research undertaken before, during and after a trial.[7-9] However, qualitative research may be used quite differently in practice and it is important to consider how qualitative research is actually used with trials, as well as its value in terms of contributing to the generation of evidence of effectiveness of treatments and services to improve health and health care. Consideration of how qualitative research is being used can identify ways of improving this endeavour and help future researchers maximise its value. For example, an excellent study of how qualitative research was used with trials of interventions to change professional practice or the organisation of care identified methodological shortcomings of the qualitative research and a lack of integration of findings from the qualitative research and trial.[7] Additionally, systematic organisation of the range of ways researchers use qualitative research with trials, such as the temporal framework, can help to educate researchers new to this endeavour about the possible uses of qualitative research, and help experienced researchers to decide how qualitative research can best be used when designing and undertaking trials. A review of practice also offers an opportunity for the research community to reflect on how they practice this endeavour. Our objective was to develop an empirically-based framework to map the aspects of trials addressed by qualitative research in current international practice, and identify the potential value of this contribution to the generation of evidence of effectiveness of health interventions.

## **Methods**

We undertook a 'systematic mapping review' of published journal articles reporting qualitative research undertaken with specific trials rather than qualitative research undertaken about trials in general. The aim of this type of review, also called a 'mapping review' or 'systematic map', is to map out and categorise existing literature on a particular topic, with further review work expected.[10]



Formal quality appraisal is not expected and synthesis is graphical or tabular. This mapping review involved a systematic search for published articles of qualitative research undertaken with trials. The aim was not to synthesise the findings from these articles but to categorise them into an inductively developed framework. ~~The review was of published journal articles rather than unpublished research because these are accessible to individuals making use of evidence of effectiveness.~~

### The search strategy

We searched the following databases for articles published between 2001 and September 2010: Medline, Premedline, Embase, The Cochrane Library, Health Technology Assessment, PsychINFO, CINAHL, British Nursing Index, Social Sciences Citation Index and ASSIA. We used two sets of search terms to identify articles using qualitative research in the context of a specific trial. We adapted the Cochrane Highly Sensitive Search Strategy for identifying randomised trials in Medline.[11] The search terms for qualitative research were more challenging. We started with a qualitative research filter,[12] but this returned many articles which were not relevant to our study. We made decisions about the terms to use for the final search in an iterative manner, balancing the need for comprehensiveness and relevance.[13] (see [Appendix 1 Figure 1](#) for search terms). We identified 15208 references, reduced to 10822 after electronic removal of duplicates. We downloaded these references to a [reference data](#) management software programme (EndNote X5).

**Figure 1 Search terms used in systematic mapping review**

| <b>Original terms identified in study proposal</b> |                                                                | <b>Additional search terms added to the search</b> |
|----------------------------------------------------|----------------------------------------------------------------|----------------------------------------------------|
| <u>Terms to identify RCT</u>                       | <u>Terms to identify qualitative research</u>                  |                                                    |
| randomised control\$<br>trial\$.mp                 | qualitative research.mp. OR<br>qualitative research/           |                                                    |
| clinical trial.mp OR<br>clinical trial/            | {qualitative ADJ3 method\$}.mp                                 |                                                    |
| pragmatic trial.mp                                 | {{qualitative ADJ3 study} OR<br>{qualitative ADJ3 studies}}.mp |                                                    |
| complex<br>intervention.mp                         | {focus group\$ OR focus group\$}.mp                            |                                                    |
| {controlled trial\$ OR<br>controlled trial\$}.mp   | narrative analysis.mp                                          |                                                    |
|                                                    | grounded theory.mp                                             |                                                    |
|                                                    | process evaluation.mp                                          |                                                    |

|  |                                                  |                                                                                                                                 |
|--|--------------------------------------------------|---------------------------------------------------------------------------------------------------------------------------------|
|  | <del>(mixed method\$ OR mixed-method\$).mp</del> |                                                                                                                                 |
|  | <del>observation\$.mp (EXCLUDED)</del>           |                                                                                                                                 |
|  | <del>interview\$ (EXCLUDED)</del>                | <del>(in-depth ADJ4 interview\$).mp</del>                                                                                       |
|  |                                                  | <del>(((((semi-structured ADJ5 interview\$) OR semistructured) ADJ5 interview\$) OR semi-structured) ADJ5 interview\$).mp</del> |
|  |                                                  | <del>qualitative-interview\$.mp</del>                                                                                           |
|  |                                                  | <del>(interview\$ AND theme\$).mp</del>                                                                                         |
|  |                                                  | <del>(interview\$ AND (audio-recorded OR audio-recorded)).mp</del>                                                              |
|  | <del>case studies (EXCLUDED)</del>               | <del>(qualitative case study OR qualitative case studies OR qualitative case study OR qualitative case studies).mp</del>        |
|  |                                                  | <del>(descriptive case study OR descriptive case studies OR descriptive case study OR descriptive case studies).mp</del>        |
|  | <del>qualitative (EXCLUDED)</del>                | <del>qualitative exploration.mp</del>                                                                                           |
|  |                                                  | <del>(qualitative analysis OR qualitative analyses OR qualitatively analy?ed).mp</del>                                          |
|  |                                                  | <del>(qualitative ADJ3 data).mp</del>                                                                                           |
|  |                                                  | <del>qualitative evaluation.mp</del>                                                                                            |
|  |                                                  | <del>qualitative intervention.mp</del>                                                                                          |
|  |                                                  | <del>qualitative approach.mp</del>                                                                                              |
|  |                                                  | <del>qualitative inquiry.mp</del>                                                                                               |
|  |                                                  | <del>discourse analysis.mp</del>                                                                                                |
|  |                                                  | <del>discursive.mp</del>                                                                                                        |
|  |                                                  | <del>phenomenological.mp</del>                                                                                                  |

1  
2  
3  
4  
5  
6  
7  
8  
9  
10  
11  
12  
13  
14  
15  
16  
17  
18  
19  
20  
21  
22  
23  
24  
25  
26  
27  
28  
29  
30  
31  
32  
33  
34  
35  
36  
37  
38  
39  
40  
41  
42  
43  
44  
45  
46  
47  
48  
49  
50  
51  
52  
53  
54  
55  
56  
57  
58  
59  
60

|  |  |                                               |
|--|--|-----------------------------------------------|
|  |  | thematic analysis.mp                          |
|  |  | ethnograph\$.mp                               |
|  |  | action research.mp                            |
|  |  | (ethno-methodology OR<br>ethnomethodology).mp |
|  |  | social-construction\$.mp                      |
|  |  | NOT phenomenological<br>characteristics.mp    |
|  |  | NOT phenomenological model.mp                 |
|  |  | NOT action-research arm-test.mp               |
|  |  | NOT protocol.ti                               |

#### Inclusion and exclusion criteria

Our inclusion criteria were articles published in English between 2001 and September 2010, reporting the findings of empirical qualitative research studies undertaken before, during or after a specific randomised controlled trial in the field of health. These could include [qualitative research published as a standalone article or qualitative research](#) reported within a mixed methods article. [We undertook the search in October 2010 and searched up to September 2010 which was the last month of publications available.](#) Our exclusion criteria were that an article was not a journal article (e.g. conference proceedings, book chapter); no abstract available; not a specific trial (e.g. qualitative research about hypothetical trials or trials in general); not qualitative research (qualitative data collection and analysis were required for inclusion); not health (e.g. education); not a report of findings of empirical research (e.g. published protocol, methodological paper, editorial); not reported in English; and not human research.

#### Screening references and abstracts

We applied the exclusion criteria electronically to the 10822 references and abstracts [by searching for terms using Endnote](#). The numbers of references we identified increased steadily between 2001 and 2009 (Figure [21](#)). The year 2010 is not reported in Figure [12](#) because we did not search the full year. Due to the large number of references identified, and the need to read abstracts and full articles for further selection and categorisation, we made the decision to focus on articles published between January 2008 and September 2010. ~~The rationale was that the most recently published articles would offer the most useful insights for future practice.~~ In this shorter time period there were 3745 references and abstracts, with 739 of these excluded by electronic application of exclusion criteria. One of the research team (SJD) read the abstracts of the remaining 3006 references and excluded a further 2,506. A sample of 100 exclusions was checked by AOC and KJT

and there was full agreement with exclusion decisions made by SJD. The most common reasons for exclusion were that the abstract did not refer to an RCT, did not use qualitative research or did not report empirical research (Figure 23). 500 abstracts remained after this screening process.

**Figure 12** Numbers of references identified for qualitative research undertaken with RCTs between 2001 and 2009

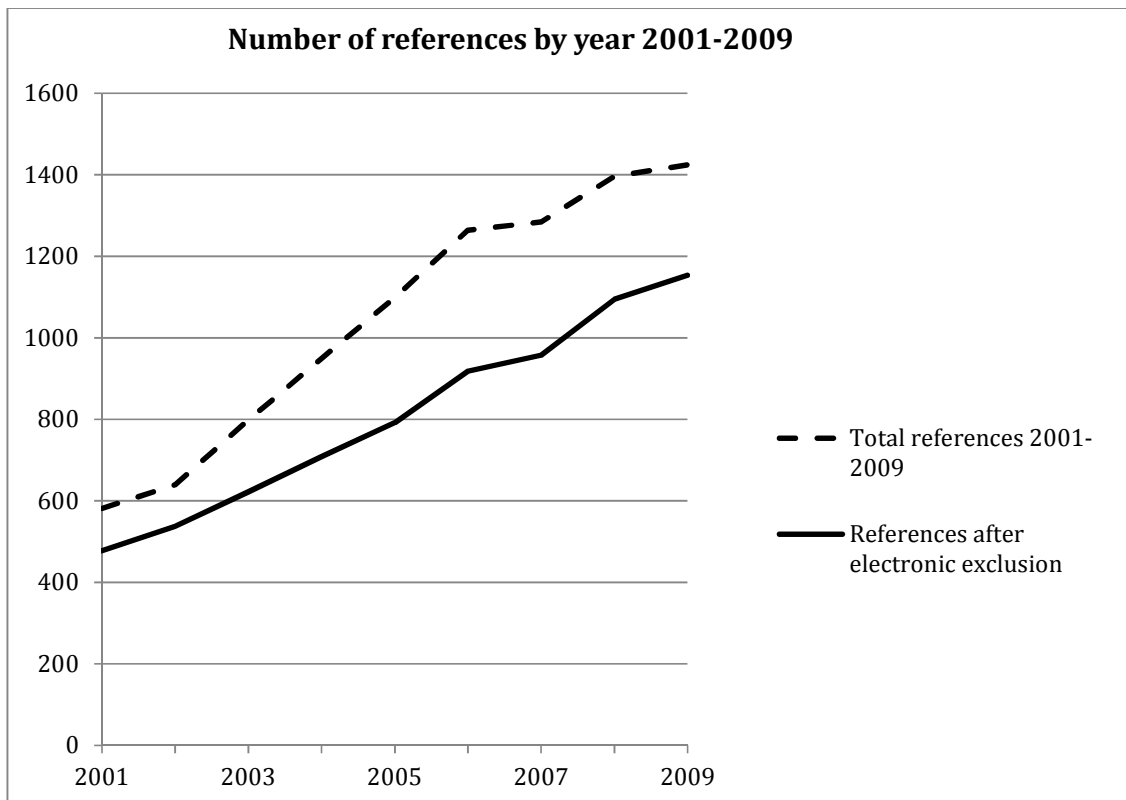

Figure 3-2 PRISMA Flow diagram for articles 2008-2010

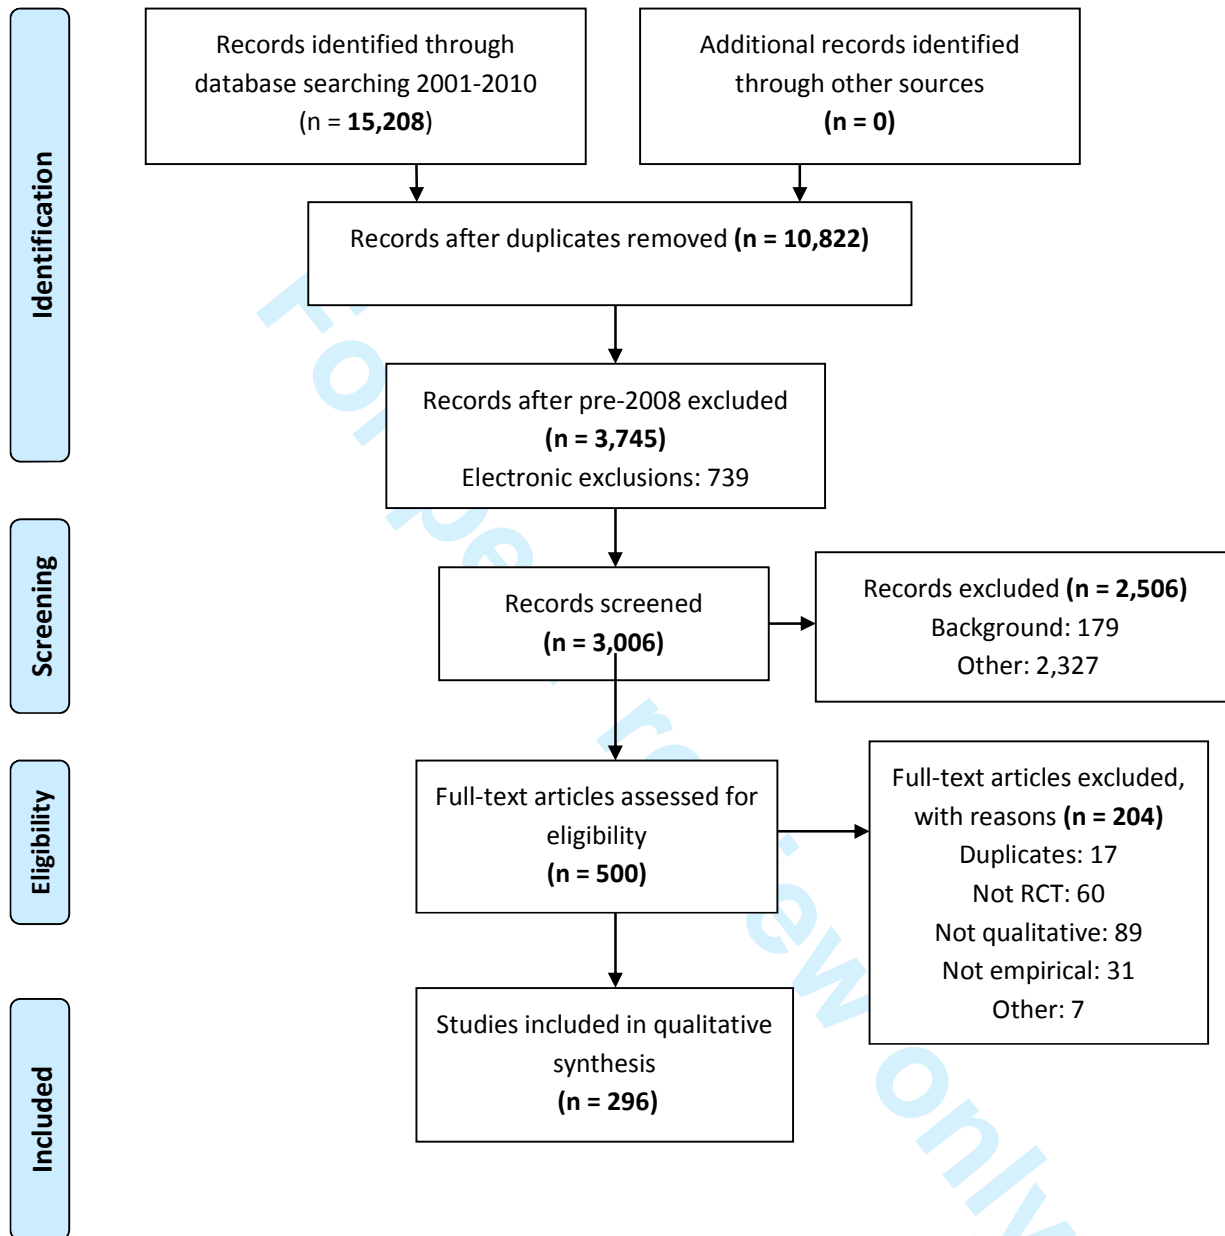

### Framework development

It was not possible to use the temporal framework of before, during and after the trial[7-9] to categorise the qualitative research because it was not possible to distinguish between 'during the trial' and 'after the trial' with any confidence. Authors of articles rarely described when the qualitative data collection or the analysis was undertaken in relation to the availability of the trial findings. We could only report the percentage undertaken before the trial. To develop a new framework, we undertook a process similar to 'framework analysis' for the analysis of qualitative data.[14] As a starting point we read about 100 abstracts and listed the stated aim of the qualitative research within the abstract to identify categories and sub-categories of the focus of the articles. After team discussions we finalised our preliminary framework and one team member (SJD) applied it to the stated aim of the qualitative research in our 500 abstracts, open to emergent categories which were then added to the framework. Then team members selected different categories to lead on and read the full articles within their categories, meeting weekly with the team to discuss exclusions (we excluded another 204 articles at this stage), re-categorisation of articles, added or collapsed categories and sub-categories, and relationships between categories. At this stage we felt that the preliminary categorisation based on the stated aim of the article did not describe the actual focus of the qualitative research. For example, articles which were originally categorised as 'exploring patients' views of the intervention' were put into new categories based on the focus of the qualitative research reported such as 'identifying the perceived value and benefits of the intervention'. Each article was allocated mainly to one sub-category but some were categorised into two or more sub-categories because the qualitative research focused on more than one issue within the article.

### Data extraction

We developed 22 sub-categories from reading the 296 abstracts and articles. We ~~and~~ extracted descriptive data on all 296 articles, including country of first author and qualitative research undertaken prior to the trial. We undertook further detailed ~~formal~~ data extraction on up to six articles within each sub-category, totalling 104 articles. These articles were selected randomly for most sub-categories, although in the large intervention sub-categories we selected six which showed the diversity of content of the sub-category. We extracted further descriptive information about country of authors and the methods used. During data extraction we identified the value of the qualitative research for generating evidence of effectiveness and documented this. For example, if the focus of the qualitative research was to identify the acceptability of an intervention in principle, then the value might have been that a planned trial was not started, because it became clear that it would have failed to recruit due to patients finding the intervention unacceptable. However, the value of the qualitative research was rarely articulated explicitly by the authors of these articles. We identified potential value based on the framing of the article in the introduction section, issues alluded to in the discussion section, and our own subjective assessment of potential value. We recognise that qualitative research has value in its own right and that we adopted a particular perspective here: the potential value of qualitative research undertaken with trials to the generation of evidence of effectiveness, viewing its utility within an 'enhancement model'. [15] That is, we

1  
2  
3 identified where it enhanced the trial endeavour rather than made an independent contribution to  
4 knowledge.  
5

6  
7  
8 The process was time consuming and resource intensive. It took 30 months from testing search  
9 terms to completion of analysis and write-up as part of a wider study which included interviews with  
10 researchers, surveys of lead investigators and a document review.  
11  
12

## 13 14 **Results**

### 15 Size of the evidence base

16  
17 We identified 296 articles published between 2008 and September 2010. There was no evidence of  
18 increasing numbers per year in this short time period: 113 articles in 2008, 105 in 2009 and 78 in the  
19 first nine months of 2010 (equivalent to 104 in a full year). For the 104 articles included in the data  
20 extraction, most of the first authors were based in North America (40) and the United Kingdom (30),  
21 with others based in Scandinavian countries (9), Australia and New Zealand (9), South Africa (6), and  
22 a range of other countries in Africa, Asia and Europe (10).  
23  
24  
25  
26  
27  
28

### 29 Framework of the focus of the qualitative research

30  
31 The final framework consisted of 22 sub-categories within five broad categories related to different  
32 aspects of the trial in terms of the intervention being tested, how the trial was designed and  
33 conducted, the outcomes of the trial, outcome and process measures used in the trial, and the  
34 health condition the intervention was aimed at (Figure 43).  
35  
36  
37  
38

### 39 Distribution of recent practice

40  
41 Sometimes articles focused on more than one aspect of the trial, with a total of 356 aspects  
42 identified in the 296 articles. The qualitative research in these articles mainly related to the content  
43 or delivery of the intervention (Table 1), particularly focusing on the feasibility and acceptability of  
44 the intervention in practice. The next largest category was the design and conduct of the trial,  
45 particularly focusing on how to improve recruitment and the ethical conduct of trials. Almost one in  
46 ten articles focused on the health condition being treated within the trial. Few articles focused on  
47 outcomes and measures. This imbalance between categories may reflect practice or may be due to  
48 some types of qualitative research undertaken with trials not being published or not being identified  
49 by our search strategy. We selected an example of research undertaken in each sub-category,  
50 summarised in Table 1. Selection was based on authors being explicit about the impact of the  
51 qualitative research on the specific trial if there was an example of this within a sub-category.  
52  
53  
54  
55  
56  
57

### 58 Timing of the qualitative research

1  
2  
3 28% (82/296) of articles reported qualitative research undertaken at the pre-trial stage, that is, as  
4 part of a pilot, feasibility or early phase trial or study in preparation for the main trial (Table 1). Some  
5 activities would be expected to occur only prior to the main trial, such as intervention development,  
6 and all of these articles were undertaken pre-trial. However, other activities which might also be  
7 expected to occur prior to the trial, such as acceptability of the intervention in principle, occurred  
8 frequently during the main trial.  
9  
10  
11  
12  
13  
14  
15  
16  
17  
18  
19  
20  
21  
22  
23  
24  
25  
26  
27  
28  
29  
30  
31  
32  
33  
34  
35  
36  
37  
38  
39  
40  
41  
42  
43  
44  
45  
46  
47  
48  
49  
50  
51  
52  
53  
54  
55  
56  
57  
58  
59  
60

For peer review only



**Figure 4-3** Framework of the focus of qualitative research used with trials

| Category                            | Sub-category                                                                                                                                                                                                                                                                                                                                                                                                                                                           |
|-------------------------------------|------------------------------------------------------------------------------------------------------------------------------------------------------------------------------------------------------------------------------------------------------------------------------------------------------------------------------------------------------------------------------------------------------------------------------------------------------------------------|
| Intervention content and delivery   | <ul style="list-style-type: none"> <li>Intervention development</li> <li>Intervention components</li> <li>Models, mechanisms and underlying theory development</li> <li>Perceived value and benefits of intervention</li> <li>Acceptability of intervention in principle</li> <li>Feasibility and acceptability of intervention in practice</li> <li>Fidelity, reach and dose of intervention</li> <li>Implementation of the intervention in the real world</li> </ul> |
| Trial design, conduct and processes | <ul style="list-style-type: none"> <li>Recruitment and retention</li> <li>Diversity of participants</li> <li>Trial participation</li> <li>Acceptability of the trial in principle</li> <li>Acceptability of the trial in practice</li> <li>Ethical conduct of trial</li> <li>Adaptation of trial conduct to local context</li> <li>Impact of trial on staff, researchers or participants</li> </ul>                                                                    |
| Outcomes                            | <ul style="list-style-type: none"> <li>Breadth of outcomes</li> <li>Variation in outcomes</li> </ul>                                                                                                                                                                                                                                                                                                                                                                   |
| Measures of process and outcome     | <ul style="list-style-type: none"> <li>Accuracy of measures</li> <li>Completion of outcome measures</li> <li>Development of outcome measures</li> </ul>                                                                                                                                                                                                                                                                                                                |
| Target condition                    | <ul style="list-style-type: none"> <li>Experience of the disease, behaviour or beliefs</li> </ul>                                                                                                                                                                                                                                                                                                                                                                      |

**Table 1 Description, distribution, timing and examples of different uses of qualitative research with trials**

| Category                          | Sub-category                                         | Description                                                                                                                                | Frequency<br>356 (100%) in 296<br>articles<br>N (%) | Timing: % of<br>sub-<br>category<br>undertaken<br>at pre-trial<br>stage | Example                                                                                                                                                                                                                                                                                                                                                                                                                                                                                                                                                                        |
|-----------------------------------|------------------------------------------------------|--------------------------------------------------------------------------------------------------------------------------------------------|-----------------------------------------------------|-------------------------------------------------------------------------|--------------------------------------------------------------------------------------------------------------------------------------------------------------------------------------------------------------------------------------------------------------------------------------------------------------------------------------------------------------------------------------------------------------------------------------------------------------------------------------------------------------------------------------------------------------------------------|
| Intervention content and delivery | Intervention development                             | Pre-trial development work relating to intervention content and delivery                                                                   | 48 (13%)                                            | 100%                                                                    | Gulbrandsen et al (2008) planned to undertake a pragmatic RCT of "Four Habits" a clinical communication tool designed and evaluated in the USA for use in Norway. They used mixed methods research to identify ways to tailor the intervention content to meet the needs of local healthcare practice. They undertook 3 focus groups with local physicians who had been given the intervention training. They confirmed cultural alignment and informed elements of the training programme for use in the planned trial.                                                       |
|                                   | Intervention components                              | Exploring individual components of a complex intervention as delivered in a specific trial                                                 | 10 (3%)                                             | 0%                                                                      | Romo et al (2009) undertook an RCT of hospital-based heroin prescription compared with methadone prescription for long-term socially-excluded opiate addicts for whom other treatments have failed. The aim of the qualitative research was to explore patients' and relatives' experience of the intervention as delivered within the trial. They undertook in-depth semi-structured interviews with 21 patients receiving the intervention and paired family members. They identified the resulting medicalisation of addiction as a separate component of the intervention. |
|                                   | Models, mechanisms and underlying theory development | Developing models, mechanisms of action and underlying theories or concepts relating to an intervention in the context of a specific trial | 23 (6%)                                             | 4%                                                                      | Byng et al (2008) as part of a cluster RCT of a multi-faceted facilitation process to improve care of patients with long-term mental illness undertook interviews with 46 practitioners and managers from 12 cluster sites to create 12 case studies. They investigated how a complex intervention led to developments in shared care for people with long-term mental illness. They identified core functions of shared care and developed a theoretical model linking intervention specific, external and generic mechanisms to improved health care.                        |
|                                   | Perceived value and benefits of intervention         | Exploring accounts of perceived value and benefits of intervention given by recipients and providers of the                                | 42 (12%)                                            | 7%                                                                      | Dowrick et al (2008) as part of an RCT of reattribution training in general practice for use with patients with medically unexplained symptoms undertook semi-structured interviews with 12 practitioners participating in the trial to explore attitudes to reattribution training amongst practitioners. They identified perceived direct and indirect                                                                                                                                                                                                                       |

|  |                                                           |                                                                                                        |          |     |                                                                                                                                                                                                                                                                                                                                                                                                                                                                                                                                                                                                                                                                                                                                                                                                                                                                                                                                                 |
|--|-----------------------------------------------------------|--------------------------------------------------------------------------------------------------------|----------|-----|-------------------------------------------------------------------------------------------------------------------------------------------------------------------------------------------------------------------------------------------------------------------------------------------------------------------------------------------------------------------------------------------------------------------------------------------------------------------------------------------------------------------------------------------------------------------------------------------------------------------------------------------------------------------------------------------------------------------------------------------------------------------------------------------------------------------------------------------------------------------------------------------------------------------------------------------------|
|  |                                                           | intervention                                                                                           |          |     | benefits e.g. increased confidence in working with this group of patients and cross-over into chronic disease management and understanding of what GPs valued about the intervention was seen as a potential mechanism for increasing the successful implementation of the intervention.                                                                                                                                                                                                                                                                                                                                                                                                                                                                                                                                                                                                                                                        |
|  | Acceptability of intervention in principle                | Exploring stakeholder perceptions of the 'in principle' acceptability an intervention                  | 32 ( 9%) | 25% | Zhang et al (2010) undertook a pre-trial study in preparation for a community-based RCT of reduction of risk of diabetes through long-term dietary change from white to brown rice. They undertook a mixed methods study with focus groups of 32 non-trial participants to explore cultural acceptability and prior beliefs about brown rice consumption amongst potential intervention recipients. They identified the beliefs held about brown rice that made it an unacceptable intervention. Results provided valuable insights to guide the design of patient information for the planned trial.                                                                                                                                                                                                                                                                                                                                           |
|  | Feasibility and acceptability of intervention in practice | Exploring stakeholder perceptions of the feasibility and acceptability of an intervention in practice  | 83 (23%) | 24% | Pope et al (2010) as part of a cluster RCT of provider-initiated HIV counselling and testing of tuberculosis patients in South Africa undertook focus groups involving 18 trial intervention providers after the trial results were known to explore the structural and personal factors that might have reduced the acceptability or feasibility of the intervention delivery by the clinic nurses. The RCT showed smaller than expected effect and the qualitative research provided insights into contextual factors that could have reduced the uptake of HIV testing and counselling, including a lack of space and privacy within the clinic itself.                                                                                                                                                                                                                                                                                      |
|  | Fidelity, reach and dose of intervention                  | Describing the fidelity, reach and dose of an intervention as delivered in a specific trial            | 12 ( 3%) | 0%  | Mukoma et al (2009) as part of a schools-based cluster RCT of an HIV education programme to delay onset of sexual intercourse and increase appropriate condom use undertook direct classroom observations (26 in 13 intervention schools), 25 semi-structured interviews with teachers (intervention deliverers) and 12 focus groups with pupils (recipients). They explored whether the intervention was implemented as planned, assessed quality and variation of intervention at a local level, and explored the relationship between fidelity of implementation and observed outcomes. They showed that the intervention was not implemented with high fidelity at many schools, and that the quality of delivery, and therefore the extent to which students were exposed to the intervention (dose), varied considerably. Observation and interview data did not always concur with quantitative assessment of fidelity (teachers' logs). |
|  | Implementation of the intervention in the real world      | Identifying lessons for 'real world' implementation based on delivery of the intervention in the trial | 4 ( 1%)  | 0%  | Carnes et al (2008) as part of an RCT comparing advice to use topical or oral NSAIDs for knee pain in older people undertook telephone interviews with 30 trial participants to explore patient reports of adverse events and expressed preferences for using one mode of analgesia administration over the other. The trial showed equivalence of effect of topical and oral NSAIDs for knee pain. In the light of these findings, the qualitative research provided a model incorporating trial findings and patient preferences into                                                                                                                                                                                                                                                                                                                                                                                                         |

1  
2  
3  
4  
5  
6  
7  
8  
9  
10  
11  
12  
13  
14  
15  
16  
17  
18  
19  
20  
21  
22  
23  
24  
25  
26  
27  
28  
29  
30  
31  
32  
33  
34  
35  
36  
37  
38  
39  
40  
41  
42  
43  
44  
45  
46  
47  
48  
49

|                                     |                                         |                                                                                            |          |     |                                                                                                                                                                                                                                                                                                                                                                                                                                                                                    |
|-------------------------------------|-----------------------------------------|--------------------------------------------------------------------------------------------|----------|-----|------------------------------------------------------------------------------------------------------------------------------------------------------------------------------------------------------------------------------------------------------------------------------------------------------------------------------------------------------------------------------------------------------------------------------------------------------------------------------------|
|                                     |                                         |                                                                                            |          |     | decision-making advice for use in practice, as well as contributed to an empirically-informed lay model for understanding the use of NSAIDs as pain relief.                                                                                                                                                                                                                                                                                                                        |
| Trial design, conduct and processes |                                         |                                                                                            | 54 (15%) |     |                                                                                                                                                                                                                                                                                                                                                                                                                                                                                    |
|                                     | Recruitment and retention               | Identifying ways of increasing recruitment and retention                                   | 11 ( 3%) | 18% | Dormandy et al (2008) as part of a cluster trial of screening for haemoglobinopathies interviewed 20 GPs in the trial to explore why general practices joined the trial and stayed in it. They identified how to overcome barriers to recruitment in future trials in primary care.                                                                                                                                                                                                |
|                                     | Diversity of participants               | Identifying ways of broadening participation in a trial to improve diversity of population | 7 ( 2%)  | 14% | Velott et al (2008) as part of a trial of a community based behavioural intervention in interconceptional women undertook 2 focus groups with 4-6 facilitators and 13 interviews with trial recruitment facilitators to document strategies used and offer perceptions of success of strategies to recruit low income rural participants. They ensured inclusion of a hard to reach group in the trial.                                                                            |
|                                     | Trial participation                     | Improving understanding of how participants join trials and experience of participation    | 4 ( 1%)  | 25% | Kohara & Inoue (2010) as part of a cancer phase I clinical trial of an anticancer drug used qualitative research to reveal the decision making processes of patients participating in or declining a trial. They undertook interviews with 25 people who did and did not participate and observation of six recruitments and identified how recruiters could be more sensitive to patients.                                                                                        |
|                                     | Acceptability of the trial in principle | Exploring stakeholders' views of acceptability of a trial design                           | 5 ( 1%)  | 60% | Campbell et al (2010) in relation to a proposed trial of arthroscopic lavage versus a placebo-surgical procedure for osteoarthritis of the knee undertook focus groups and 21 interviews with health professionals and patients to describe attitudes of stakeholders to a trial. In principle the trial was acceptable but placebo trials were not acceptable to some stakeholders.                                                                                               |
|                                     | Acceptability of the trial in practice  | Exploring stakeholders views of acceptability of a trial design in practice                | 4 ( 1%)  | 25% | Tutton & Gray (2009) as part of a feasibility trial of fluid optimisation after hip fracture undertook two focus groups with 17 staff and an interview with the research nurse to increase knowledge of implementation of the intervention and feasibility of the trial. They identified difficulty recruiting for the trial in a busy healthcare environment.                                                                                                                     |
|                                     | Ethical conduct                         | Strengthening the ethical conduct of a trial, e.g. informed consent procedures             | 16 ( 4%) | 12% | Penn & Evans (2009) as part of a community versus clinic-based antiretroviral medication in a multisite trial in South Africa undertook observation and interviews with 13 recruiters and 19 students going through two different informed consent processes in order to understand the effectiveness of using a modified informed consent process rather than a standard one. They identified ways of improving ethics and reducing anxiety when enrolling people in such trials. |

1  
2  
3  
4  
5  
6  
7  
8  
9  
10  
11  
12  
13  
14  
15  
16  
17  
18  
19  
20  
21  
22  
23  
24  
25  
26  
27  
28  
29  
30  
31  
32  
33  
34  
35  
36  
37  
38  
39  
40  
41  
42  
43  
44  
45  
46  
47  
48  
49

|                                 |                                                       |                                                                              |                     |     |                                                                                                                                                                                                                                                                                                                                                                                                                                                                                                                |
|---------------------------------|-------------------------------------------------------|------------------------------------------------------------------------------|---------------------|-----|----------------------------------------------------------------------------------------------------------------------------------------------------------------------------------------------------------------------------------------------------------------------------------------------------------------------------------------------------------------------------------------------------------------------------------------------------------------------------------------------------------------|
|                                 | Adaptation of trial conduct to local context          | Addressing local issues which may impact on the feasibility of a trial       | 2 ( 1%)             | 50% | Shagi et al (2008) as part of a feasibility study for an efficacy and safety phase III trial of vaginal microbicide undertook participatory action research, including interviews and workshops, to explore the feasibility of a community liaison system. They reported improving the ethical conduct, recruitment and retention for the main trial.                                                                                                                                                          |
|                                 | Impact of trial on staff, researchers or participants | Understanding how the trial affects different stakeholders e.g. workload     | 5 ( 1%)             | 20% | Grbich et al (2008) as part of a factorial cluster trial of different models of palliative care including educational outreach and case conferences undertook qualitative research to explore the effect of the trial on staff. They undertook a longitudinal focus group study (11 in total) with staff delivering the intervention and collecting the data at three time points during the trial. The reported impact on the trial was improved trial procedures and keeping people on board with the trial. |
| Outcomes                        | Breadth of outcomes                                   | Identifies the range of outcomes important to participants in the trial      | 5 ( 1%)<br>1 (<1%)  | 0%  | Alraek & Malterud (2009) as part of a pragmatic RCT of acupuncture to reduce symptoms of the menopause used written answers to an open question on a questionnaire to 127 patients in intervention arm to describe reported changes in health in the acupuncture arm of trial, concluding that the range of outcomes in the trial were not comprehensive.                                                                                                                                                      |
|                                 | Variation in outcomes                                 | Explains differences in outcomes between clusters or participants in a trial | 4 ( 1%)             | 0%  | Hoddinott et al (2010) in a cluster RCT of community breast-feeding support groups to increase breast-feeding rates undertook 64 ethnographic in-depth interviews, 13 focus groups and 17 observations to produce a locality case study for each of 7 intervention clusters. Explained variation in the 7 communities and why rates decreased in some as well as increased in others.                                                                                                                          |
| Measures of process and outcome | Accuracy of measures                                  | Assesses validity of process and outcome measures in the trial               | 10 ( 3%)<br>7 ( 2%) | 43% | Farquhar et al (2010) in a phase II pilot RCT of breathlessness intervention for chronic obstructive pulmonary disease used qualitative research to explore the feasibility of using an outcome measure for the main trial. They used longitudinal interviews with 13 patients in the intervention arm on 51 occasions and recordings of participants completing a questionnaire. They rejected the use of the outcome measure for the main trial due to lack of validity in this patient group.               |
|                                 | Completion of outcome measures                        | Explores why participants complete measures or not                           | 1 (<1%)             | 0%  | Nakash et al (2008) within an RCT of mechanical supports for severe ankle sprains used qualitative research to examine factors affecting response and non-response to a survey measuring outcomes. They undertook interviews with 22 participants, 8 of whom had not responded, and identified reasons for non-response such as not understanding the trial and feeling fully recovered.                                                                                                                       |

|                  |                                                 |                                                                                                                               |         |    |                                                                                                                                                                                                                                                                                                                                                                                                                                                            |
|------------------|-------------------------------------------------|-------------------------------------------------------------------------------------------------------------------------------|---------|----|------------------------------------------------------------------------------------------------------------------------------------------------------------------------------------------------------------------------------------------------------------------------------------------------------------------------------------------------------------------------------------------------------------------------------------------------------------|
|                  | Development of outcome measures                 | Contributes to development of new process and secondary outcome measures                                                      | 2 ( 1%) | 0% | Abetz et al (2009) within a double blind placebo RCT of patch treatment in Alzheimer's disease used qualitative research to identify items for an instrument for use in their RCT and check the acceptability of a developed questionnaire on carer satisfaction. They undertook 3 focus groups with 24 carers prior to the RCT to identify items and 10 cognitive interviews during the RCT to contribute to assessment of the validity of measures used. |
| Target condition | Experience of the disease, behaviour or beliefs | Explores the experience of having or treating a condition that the intervention is aimed at, or a related behaviour or belief | 33 (9%) | 6% | Chew-Graham et al (2009) within a pragmatic RCT of anti-depressants versus counselling for postnatal depression undertook qualitative research to explore patient and health professional views about disclosure of symptoms of postnatal depression. They undertook interviews with 61 staff and patients from both arms of the trial, offering reflections on implications for clinical practice in this patient group.                                  |

### Potential value

We identified the potential value of the qualitative research undertaken within each sub-category (Figure 54). The range of potential values identified was wide, offering a set of rationales for undertaking qualitative research with trials, for example to improve the external validity of a trial by identifying solutions to barriers to recruitment in hard to reach groups, or to facilitate transferability of findings in the real world by exploring contextual issues important to the implementation of the intervention. Qualitative research undertaken at the pre-trial stage has the potential to impact on the main trial as well as future trials. We identified examples of the qualitative research impacting on the main trial e.g. by changing the outcome measure to be used in the main trial. Qualitative research undertaken with the main trial also has the potential to impact on that trial, for example by facilitating interpretation of the trial findings. However, in practice we found few examples of this in the articles. Given that so much of this endeavour occurred at the main trial stage, we mainly identified learning for future trials. We also found that the learning for future trials was not necessarily explicit within the articles.

**Figure 5.4** Potential value of the qualitative research to the generation of evidence of effectiveness

|                | Potential value                                                                                                              | Examples                                                                                                                                                                                                                                                                                                                       |
|----------------|------------------------------------------------------------------------------------------------------------------------------|--------------------------------------------------------------------------------------------------------------------------------------------------------------------------------------------------------------------------------------------------------------------------------------------------------------------------------|
| Bias           | Avoids measurement bias                                                                                                      | Helps test face and content validity of instruments in the relevant patient group.                                                                                                                                                                                                                                             |
| Efficiency     | Increases recruitment rate<br><br>Saves money                                                                                | Use of observation and interviews to identify problems with recruitment in a specific trial.<br><br>Stops attempts to undertake full trials of poor or unacceptable interventions, or use unacceptable trial designs.<br><br>Ensures full trials, which can be very expensive, are only undertaken on optimised interventions. |
| Ethics         | Makes trials sensitive to human beings<br><br>Improves informed consent                                                      | Recruitment and communication strategies can pay attention to health professionals and patients so that the experience is positive for them.<br><br>Challenges current assumptions about gold standard informed consent which values information over communication.                                                           |
| Implementation | Facilitates replicability of intervention in the real world<br><br>Facilitates transferability of findings in the real world | Describes components of the intervention so that others can make use of the full intervention in the real world.<br><br>Identifies mechanism of action or contextual issues important for success.                                                                                                                             |
| Interpretation | Explains trial findings                                                                                                      | Explains why trials were null. This may prevent another trial of a similar intervention.<br><br>Contextualises results of successful interventions to support dissemination and transferability in the real world.<br><br>Explains variation in outcomes.                                                                      |
| Relevance      | Ensures interventions meet the needs of health professionals and patients                                                    | Identifies the value of the intervention to important stakeholders.<br><br>Ensures the intervention is contextually or culturally appropriate in different settings.                                                                                                                                                           |
| Success        | Makes a trial successful, feasible, viable                                                                                   | Engenders stakeholder support for the trial.<br><br>Makes a trial locally appropriate to cultural needs.                                                                                                                                                                                                                       |
| Validity       | Improves internal validity<br><br>Improves external validity                                                                 | Ensures right measures are used to measure right outcomes.<br><br>Helps to broaden recruitment to hard to reach groups.                                                                                                                                                                                                        |



## Discussion

### Summary of findings

A large number of journal articles have been published which report the use of qualitative research with trials. This is an international endeavour which is likely to have increased over the past ten years. Researchers have published articles focusing on a wide range of aspects of trials, particularly the intervention and the design and conduct of trials. Most of this research was undertaken with main trials rather than pre-trial where it could have optimised the intervention or trial conduct for the main trial. The potential value of the qualitative research to the endeavour of generating evidence of effectiveness of health interventions was considerable, and included improving the external validity of trials, facilitating interpretation of trial findings, helping trialists to be sensitive to the human beings who participate in trials, and saving money by steering researchers towards interventions more likely to be effective in future trials. However there were indications that researchers were not capitalising on this potential because lessons learnt were for future trials rather than the trial the qualitative research was undertaken with, and these lessons were not always explicitly articulated within these articles so that researchers not involved in the original research project could utilise them.

### Strengths, weaknesses and reflexivity

One strength of the framework developed here is that it was based on published international research which is available to those making use of evidence of effectiveness. The development of the framework was part of a larger study identifying good practice within each sub-category, looking beyond published articles to research proposals and reports, and interviewing researchers who have participated in these studies. The weaknesses are that first, not all qualitative research undertaken with trials is published in peer-reviewed journals[1] and some types may be published more than others. However, the framework was grounded in the research which researchers chose to publish, identifying the issues which they or journals perceived as important. Second, some qualitative research undertaken with trials may not refer to the trial in the qualitative article and therefore may not have been included here. This may have affected some of the sub-categories more than others and thus misrepresented the balance of contributions within the framework. However, if we could not relate an article to a specific trial, then others will also face this barrier, limiting ~~limited~~ the value of the research for users of evidence of effectiveness. Third, only English language articles were included. Fourth, the inclusion criteria relied largely on the abstract and some studies may have been excluded at an early stage which should have been included, resulting in an underestimate of the amount of this research that has been published. ~~Fifth~~, we acknowledge that the generation of sub-categories was subjective and some of them could have been divided further into another set of sub sub-categories. Another research group may have developed a different framework. Our research group was interested in whether qualitative research undertaken with trials was actually delivering the added-value promised within the literature.[1-4] Finally, the actual impact of this qualitative research on trials may be located in articles reporting the trials, although

1  
2  
3 even studies of all documents and publications of these types of studies found a lack of integration  
4 of findings from the trial and qualitative research.[7]  
5  
6  
7

### 8 Context of other research 9

10 There was a large overlap between our sub-categories and the items listed in two temporal  
11 frameworks.[7,8] However, our framework added a whole category of work around the design and  
12 conduct of the trial to one of the existing frameworks.[7] It also showed that the timing of  
13 qualitative research in relation to a trial is different in practice from that identified in existing  
14 frameworks. For example, both of the temporal frameworks include in the 'after' period the use of  
15 qualitative research to explain variation in outcomes yet this qualitative research occurred during  
16 the trials in our study.[16] Some of the discussion of the use of qualitative research with trials relates  
17 to complex interventions,[1-4] but we found that in practice it was also used with drug trials  
18 involving complex patient groups[17] or occurring in complex environments.[18]  
19  
20  
21

22 Our research highlights the difference between the starting place of qualitative research with trials,  
23 which may be general (for example 'to explore the views of those providing and receiving the  
24 intervention'), and the focus of a particular publication, which may be more specific (for example  
25 where exploration of these views identifies problems with acceptability of the intervention). So  
26 researchers may not plan to consider the acceptability of an intervention in principle during the  
27 main trial but may find that this emerges as an issue and is extremely important because it explains  
28 why the trial failed to recruit or the intervention was ineffective. This learning can offer guidance for  
29 future trials of similar families of interventions. However, one can also ask whether enough  
30 qualitative research is being undertaken at the pre-trial stage to reduce the chance of finding  
31 unwelcome surprises during the main trial. Another study, which had included unpublished  
32 qualitative research,[7] found that there was more use of qualitative research before than during  
33 the trial so it may be that this work is being undertaken but not being published.  
34  
35  
36  
37

38 Previous research has shown that most of the trial and qualitative publications had no evidence of  
39 integration at the level of interpretation and that few qualitative studies were used to explain the  
40 trial findings.[7] Lewin and colleagues identified problems with reporting the qualitative research in  
41 that authors could have been more explicit about how qualitative research helped develop the  
42 intervention or explained findings. We found examples where researchers were explicit about  
43 learning for the trial[16]but the message that emerges from both Lewin et al's research[7] and our  
44 own is that this may be something researchers expect to happen more than it actually happens in  
45 practice.  
46  
47  
48

49 Qualitative research undertaken with trials is also relevant to systematic reviews, adding value to  
50 systematic reviews rather than simply the specific trial.[19] Noyes and colleagues identify the value  
51 of this research in enhancing the relevance and utility of a systematic review of trials to potential  
52 research users and in explaining heterogeneity of findings in a review. However they also highlight  
53 the problem of retrieving these articles. Our research shows that even when systematic reviewers  
54 locate these articles they will have to do the work in terms of thinking about the relevance of these  
55 articles to the trial-based evidence, because the authors themselves may not have been explicit  
56 about this.  
57  
58  
59  
60

### Implications

Qualitative research can help to optimise interventions and trial procedures, measure the right outcomes in the right way, and understand more about the health condition under study which then feeds back into optimising interventions for that condition. Researchers cannot undertake qualitative research about all these issues for every trial. They may wish to consider problems they think they might face within a particular trial and prioritise the use of qualitative research to address these issues, whilst also staying open to emergent~~ey~~ issues. The framework presented here may be productively used by researchers to learn about the range of ways qualitative research can help randomised controlled trials and assist them to report explicitly the implications for future trials or evidence of effectiveness of health interventions so that potential value can be realised. We see this framework as a starting point that hopefully will develop further in the future.

### Conclusions

A large amount of qualitative research undertaken with specific trials has been published, addressing a wide range of aspects of trials, with the potential to improve the endeavour of generating evidence of effectiveness of health interventions. Researchers can increase the impact of this work on trials by undertaking more of it at the pre-trial stage and being explicit within their articles about the learning for trials and evidence-based practice.

### Competing interests

None

### Funding

Medical Research Council reference G0901335. Involvement of funder/sponsor: none.

### Ethics approval

Not required because no humans involved.

### Data sharing

No data to share.

### Copyright

1  
2  
3 The Corresponding Author has the right to grant on behalf of all authors and does grant on behalf of  
4 all authors, an exclusive licence (or non exclusive for government employees) on a worldwide basis  
5 to the BMJ Publishing Group Ltd and its Licensees to permit this article (if accepted) to be published  
6 in BMJ editions and any other BMJ PGL products and sublicences to exploit all subsidiary rights, as set  
7 out in our licence (<http://resources.bmj.com/bmj/authors/checklists-forms/licence-for-publication>).  
8  
9

### 10 11 12 **Contributions**

13  
14 AOC and KJT designed the study. AOC, KJT and JH obtained funding. AOC, KJT, SJD, and AR collected  
15 and analysed data. JH commented on data collection and analysis. AOC wrote the first draft and all  
16 authors contributed to editing the drafts. AOC acts as guarantor of the paper.  
17  
18  
19

### 20 21 **References**

22  
23 1 Campbell M, Fitzpatrick R, Haines A, Kinmonth AL, Sandercock P, Spiegelhalter D, et al. Framework  
24 for design and evaluation of complex interventions to improve health. *BM J* 2000;**321**:694-696.  
25

26 2 Campbell N, Murray E, Darbyshire J, Emery J, Farmer A, Griffiths F, et al. Designing and evaluating  
27 complex interventions to improve health care. *BMJ* 2007;**334**:455-459.  
28

29 3 Craig P, Dieppe P, Macintyre S, Michie S, Nazareth I, Petticrew M. Developing and evaluating  
30 complex interventions: the new Medical Research Council guidance. *BMJ* 2008;**337**:979-983.  
31

32 4 Oakley A, Strange V, Bonell C, Allen E, Stephenson J, RIPPLE Study Team. Process evaluation in  
33 randomised controlled trials of complex interventions. *BMJ* 2006;**332**:413-6.  
34

35 5 Bradley F, Wiles R, Kinmonth AL, Mant D, Gantley M. Development and evaluation of complex  
36 interventions in health services research: case study of the Southampton heart integrated care  
37 project (SHIP). *BMJ* 1999;**318**:711-715.  
38

39 6 Donovan J, Mills N, Smith M, Brindle L, Jacoby A, Peters T, et al. Improving design and conduct of  
40 randomised trials by embedding them in qualitative research: ProtecT (prostate testing for cancer  
41 and treatment) study. *BMJ* 2002;**325**:766-770.  
42

43 7 Lewin S, Glenton C, Oxman AD. Use of qualitative methods alongside randomised controlled trials  
44 of complex healthcare interventions: methodological study. *BMJ* 2009;**339**:b3496.  
45

46 8 Creswell JW, Fetters MD, Plano Clark VL, Morales A. Mixed methods intervention trials. In: Andrew  
47 S, Halcomb EJ, eds. *Mixed methods research for nursing and the health sciences*. 2009:161-180.  
48

49 9 Sandelowski M. Using qualitative methods in interventions studies. *Research in Nursing and Health*  
50 1996;**19**:359-364.  
51

52 10 Grant MJ, Booth A. A typology of reviews: an analysis of 14 review types and associated  
53 methodologies. *Health Information and Libraries Journal* 2009;**26**:91-108.  
54  
55  
56  
57  
58  
59  
60

1  
2  
3 11 Lefebvre C, Manheimer E, Glanville J. Chapter 6: searching for studies. In: Higgins JPT, Green S,  
4 eds. Cochrane handbook for systematic reviews of interventions. Version 5.0.2 [updated September  
5 2009]. The Cochrane Collaboration, 2009.  
6

7  
8 12 Grant MJ 2000. Searching for qualitative research studies on the Medline database [oral  
9 presentation]. Qualitative Evidence Based Practice Conference; 2000 May 14-16; Coventry University,  
10 UK.  
11

12 13 Lefebvre C, Manheimer E, Glanville J. Chapter 6: Searching for studies. In: Higgins JPT, Green S  
13 (editors). Cochrane Handbook for Systematic Reviews of Interventions. Version 5.0.1 [updated  
14 September 2008]. The Cochrane Collaboration, 2008. Available from [www.cochrane-handbook.org](http://www.cochrane-handbook.org)  
15

16 14 Ritchie J, Spencer L. Qualitative data analysis for applied policy research. In: Bryman A, Burgess  
17 RG, eds. Analysing qualitative data. Routledge 1994:173-194.  
18

19 15 Popay J, Williams G. Qualitative research and evidence-based healthcare. J R Soc Med  
20 1998;Suppl 35:32-37.  
21

22 16 Hoddinott P, Britten J, Prescott GJ, Tappin D, Ludbrook A, Godden DJ. Effectiveness of policy to  
23 provide breastfeeding groups (BIG) for pregnant and breastfeeding mothers in primary care: cluster  
24 randomised controlled trial. BMJ 2009;338:a3026.  
25  
26

27 17 Romo N, Poo M, Ballesta R, the PEPSA team. From illegal poison to legal medicine: A qualitative  
28 research in a heroin-prescription trial in Spain. Drug and Alcohol Review 2009;28:186-195.  
29

30 18 Shagi C, Vallely A, Kasindia S, Chiduoc B, Desmond N, Sotelia S, et al. A model for community  
31 representation and participation in HIV prevention trials among women who engage in transactional  
32 sex in Africa. AIDS Care 2008;20:1039-1049.  
33  
34

35 19 Noyes J, Popay J, Pearson A, Hannes K, Booth A. Chapter 20 Qualitative research and Cochrane  
36 reviews. Cochrane Handbook 2011, [www.cochrane-handbook.org](http://www.cochrane-handbook.org) (accessed 16.5.2011)  
37  
38  
39  
40  
41  
42  
43  
44  
45  
46  
47  
48  
49  
50  
51  
52  
53  
54  
55  
56  
57  
58  
59  
60

**Appendix Search terms used in systematic mapping review**

| <b>Original terms identified in study proposal</b>   |                                                                    | <b>Additional search terms added to the search</b>                                                                          |
|------------------------------------------------------|--------------------------------------------------------------------|-----------------------------------------------------------------------------------------------------------------------------|
| <u>Terms to identify RCT</u>                         | <u>Terms to identify qualitative research</u>                      |                                                                                                                             |
| <u>randomised control\$ trial\$.mp</u>               | <u>qualitative research.mp. OR qualitative research/</u>           |                                                                                                                             |
| <u>clinical trial.mp OR clinical trial/</u>          | <u>(qualitative ADJ3 method\$).mp</u>                              |                                                                                                                             |
| <u>pragmatic trial.mp</u>                            | <u>((qualitative ADJ3 study) OR (qualitative ADJ3 studies)).mp</u> |                                                                                                                             |
| <u>complex intervention.mp</u>                       | <u>(focus group\$ OR focus-group\$).mp</u>                         |                                                                                                                             |
| <u>(controlled trial\$ OR controlled-trial\$).mp</u> | <u>narrative analysis.mp</u>                                       |                                                                                                                             |
|                                                      | <u>grounded theory.mp</u>                                          |                                                                                                                             |
|                                                      | <u>process evaluation.mp</u>                                       |                                                                                                                             |
|                                                      | <u>(mixed method\$ OR mixed-method\$).mp</u>                       |                                                                                                                             |
|                                                      | <u>observation\$.mp (EXCLUDED)</u>                                 |                                                                                                                             |
|                                                      | <u>interview\$ (EXCLUDED)</u>                                      | <u>(in-depth ADJ4 interview\$).mp</u>                                                                                       |
|                                                      |                                                                    | <u>(((((semi structured ADJ5 interview\$) OR semistructured) ADJ5 interview\$) OR semi-structured) ADJ5 interview\$).mp</u> |
|                                                      |                                                                    | <u>qualitative interview\$.mp</u>                                                                                           |
|                                                      |                                                                    | <u>(interview\$ AND theme\$).mp</u>                                                                                         |
|                                                      |                                                                    | <u>(interview\$ AND (audio recorded OR audio-recorded)).mp</u>                                                              |
|                                                      | <u>case studies (EXCLUDED)</u>                                     | <u>(qualitative case study OR qualitative case studies OR qualitative case-study OR qualitative case-studies).mp</u>        |

|  |                                        |                                                                                                                               |
|--|----------------------------------------|-------------------------------------------------------------------------------------------------------------------------------|
|  |                                        | <a href="#">(descriptive case study OR descriptive case studies OR descriptive case-study OR descriptive case-studies).mp</a> |
|  | <a href="#">qualitative (EXCLUDED)</a> | <a href="#">qualitative exploration.mp</a>                                                                                    |
|  |                                        | <a href="#">(qualitative analysis OR qualitative analyses OR qualitatively analy?ed).mp</a>                                   |
|  |                                        | <a href="#">(qualitative ADJ3 data).mp</a>                                                                                    |
|  |                                        | <a href="#">qualitative evaluation.mp</a>                                                                                     |
|  |                                        | <a href="#">qualitative intervention.mp</a>                                                                                   |
|  |                                        | <a href="#">qualitative approach.mp</a>                                                                                       |
|  |                                        | <a href="#">qualitative inquiry.mp</a>                                                                                        |
|  |                                        | <a href="#">discourse analysis.mp</a>                                                                                         |
|  |                                        | <a href="#">discursive.mp</a>                                                                                                 |
|  |                                        | <a href="#">phenomenological.mp</a>                                                                                           |
|  |                                        | <a href="#">thematic analysis.mp</a>                                                                                          |
|  |                                        | <a href="#">ethnograph\$.mp</a>                                                                                               |
|  |                                        | <a href="#">action research.mp</a>                                                                                            |
|  |                                        | <a href="#">(ethno methodology OR ethnomethodology).mp</a>                                                                    |
|  |                                        | <a href="#">social construction\$.mp</a>                                                                                      |
|  |                                        | <a href="#">NOT phenomenological characteristics.mp</a>                                                                       |
|  |                                        | <a href="#">NOT phenomenological model.mp</a>                                                                                 |
|  |                                        | <a href="#">NOT action research arm test.mp</a>                                                                               |
|  |                                        | <a href="#">NOT protocol.ti</a>                                                                                               |



# PRISMA 2009 Checklist

| Section/topic                      | #  | Checklist item                                                                                                                                                                                                                                                                                              | Reported on page # |
|------------------------------------|----|-------------------------------------------------------------------------------------------------------------------------------------------------------------------------------------------------------------------------------------------------------------------------------------------------------------|--------------------|
| <b>TITLE</b>                       |    |                                                                                                                                                                                                                                                                                                             |                    |
| Title                              | 1  | Identify the report as a systematic review, meta-analysis, or both.                                                                                                                                                                                                                                         | 1                  |
| <b>ABSTRACT</b>                    |    |                                                                                                                                                                                                                                                                                                             |                    |
| Structured summary                 | 2  | Provide a structured summary including, as applicable: background; objectives; data sources; study eligibility criteria, participants, and interventions; study appraisal and synthesis methods; results; limitations; conclusions and implications of key findings; systematic review registration number. | 2                  |
| <b>INTRODUCTION</b>                |    |                                                                                                                                                                                                                                                                                                             |                    |
| Rationale                          | 3  | Describe the rationale for the review in the context of what is already known.                                                                                                                                                                                                                              | 3                  |
| Objectives                         | 4  | Provide an explicit statement of questions being addressed with reference to participants, interventions, comparisons, outcomes, and study design (PICOS).                                                                                                                                                  | N/A                |
| <b>METHODS</b>                     |    |                                                                                                                                                                                                                                                                                                             |                    |
| Protocol and registration          | 5  | Indicate if a review protocol exists, if and where it can be accessed (e.g., Web address), and, if available, provide registration information including registration number.                                                                                                                               | Not available      |
| Eligibility criteria               | 6  | Specify study characteristics (e.g., PICOS, length of follow-up) and report characteristics (e.g., years considered, language, publication status) used as criteria for eligibility, giving rationale.                                                                                                      | 6                  |
| Information sources                | 7  | Describe all information sources (e.g., databases with dates of coverage, contact with study authors to identify additional studies) in the search and date last searched.                                                                                                                                  | 4                  |
| Search                             | 8  | Present full electronic search strategy for at least one database, including any limits used, such that it could be repeated.                                                                                                                                                                               | 4-6                |
| Study selection                    | 9  | State the process for selecting studies (i.e., screening, eligibility, included in systematic review, and, if applicable, included in the meta-analysis).                                                                                                                                                   | 6                  |
| Data collection process            | 10 | Describe method of data extraction from reports (e.g., piloted forms, independently, in duplicate) and any processes for obtaining and confirming data from investigators.                                                                                                                                  | 9                  |
| Data items                         | 11 | List and define all variables for which data were sought (e.g., PICOS, funding sources) and any assumptions and simplifications made.                                                                                                                                                                       | 9                  |
| Risk of bias in individual studies | 12 | Describe methods used for assessing risk of bias of individual studies (including specification of whether this was done at the study or outcome level), and how this information is to be used in any data synthesis.                                                                                      | N/A                |
| Summary measures                   | 13 | State the principal summary measures (e.g., risk ratio, difference in means).                                                                                                                                                                                                                               | N/A                |
| Synthesis of results               | 14 | Describe the methods of handling data and combining results of studies, if done, including measures of consistency (e.g., $I^2$ for each meta-analysis)                                                                                                                                                     | N/A                |





# PRISMA 2009 Checklist

Page 1 of 2

| Section/topic                 | #  | Checklist item                                                                                                                                                                                           | Reported on page # |
|-------------------------------|----|----------------------------------------------------------------------------------------------------------------------------------------------------------------------------------------------------------|--------------------|
| Risk of bias across studies   | 15 | Specify any assessment of risk of bias that may affect the cumulative evidence (e.g., publication bias, selective reporting within studies).                                                             | N/A                |
| Additional analyses           | 16 | Describe methods of additional analyses (e.g., sensitivity or subgroup analyses, meta-regression), if done, indicating which were pre-specified.                                                         | N/A                |
| <b>RESULTS</b>                |    |                                                                                                                                                                                                          |                    |
| Study selection               | 17 | Give numbers of studies screened, assessed for eligibility, and included in the review, with reasons for exclusions at each stage, ideally with a flow diagram.                                          | 8                  |
| Study characteristics         | 18 | For each study, present characteristics for which data were extracted (e.g., study size, PICOS, follow-up period) and provide the citations.                                                             | N/A                |
| Risk of bias within studies   | 19 | Present data on risk of bias of each study and, if available, any outcome level assessment (see item 12).                                                                                                | N/A                |
| Results of individual studies | 20 | For all outcomes considered (benefits or harms), present, for each study: (a) simple summary data for each intervention group (b) effect estimates and confidence intervals, ideally with a forest plot. | N/A                |
| Synthesis of results          | 21 | Present results of each meta-analysis done, including confidence intervals and measures of consistency.                                                                                                  | N/A                |
| Risk of bias across studies   | 22 | Present results of any assessment of risk of bias across studies (see Item 15).                                                                                                                          | N/A                |
| Additional analysis           | 23 | Give results of additional analyses, if done (e.g., sensitivity or subgroup analyses, meta-regression [see Item 16]).                                                                                    | N/A                |
| <b>DISCUSSION</b>             |    |                                                                                                                                                                                                          |                    |
| Summary of evidence           | 24 | Summarize the main findings including the strength of evidence for each main outcome; consider their relevance to key groups (e.g., healthcare providers, users, and policy makers).                     | 19                 |
| Limitations                   | 25 | Discuss limitations at study and outcome level (e.g., risk of bias), and at review-level (e.g., incomplete retrieval of identified research, reporting bias).                                            | 19                 |
| Conclusions                   | 26 | Provide a general interpretation of the results in the context of other evidence, and implications for future research.                                                                                  | 21                 |
| <b>FUNDING</b>                |    |                                                                                                                                                                                                          |                    |
| Funding                       | 27 | Describe sources of funding for the systematic review and other support (e.g., supply of data); role of funders for the systematic review.                                                               | 21                 |

From: Moher D, Liberati A, Tetzlaff J, Altman DG, The PRISMA Group (2009). Preferred Reporting Items for Systematic Reviews and Meta-Analyses: The PRISMA Statement. PLoS Med 6(6): e1000097. doi:10.1371/journal.pmed1000097

For more information, visit: [www.prisma-statement.org](http://www.prisma-statement.org).

Page 2 of 2

For peer review only - <http://bmjopen.bmj.com/site/about/guidelines.xhtml>

Figure 1 Numbers of references identified for qualitative research undertaken with RCTs between 2001 and 2009

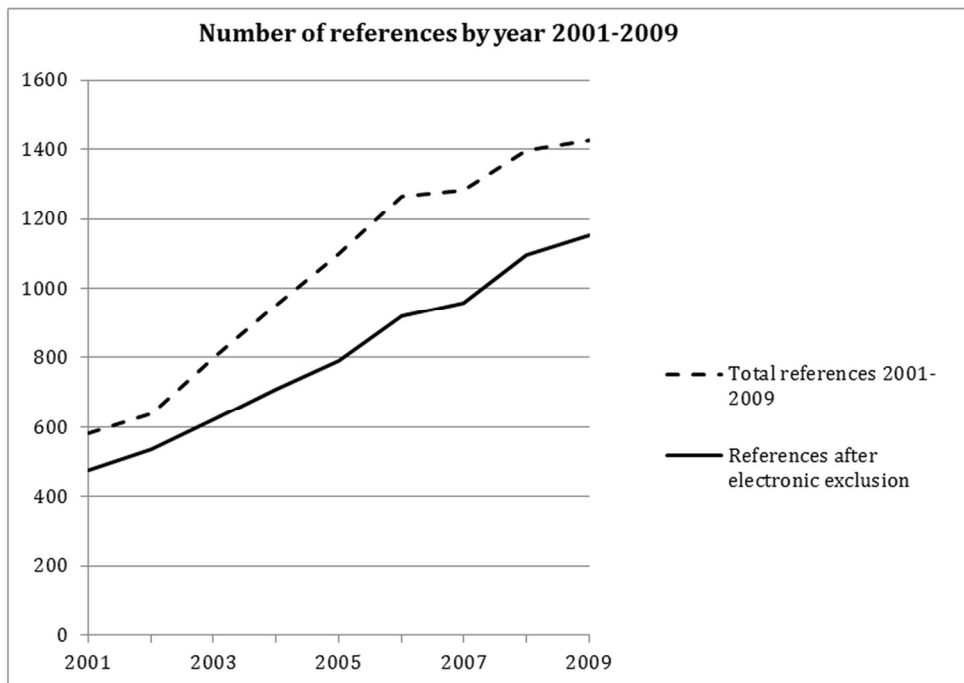

113x90mm (300 x 300 DPI)

ew only

1  
2  
3  
4  
5  
6  
7  
8  
9  
10  
11  
12  
13  
14  
15  
16  
17  
18  
19  
20  
21  
22  
23  
24  
25  
26  
27  
28  
29  
30  
31  
32  
33  
34  
35  
36  
37  
38  
39  
40  
41  
42  
43  
44  
45  
46  
47  
48  
49  
50  
51  
52  
53  
54  
55  
56  
57  
58  
59  
60

Figure 2 PRISMA Flow diagram for articles 2008-2010

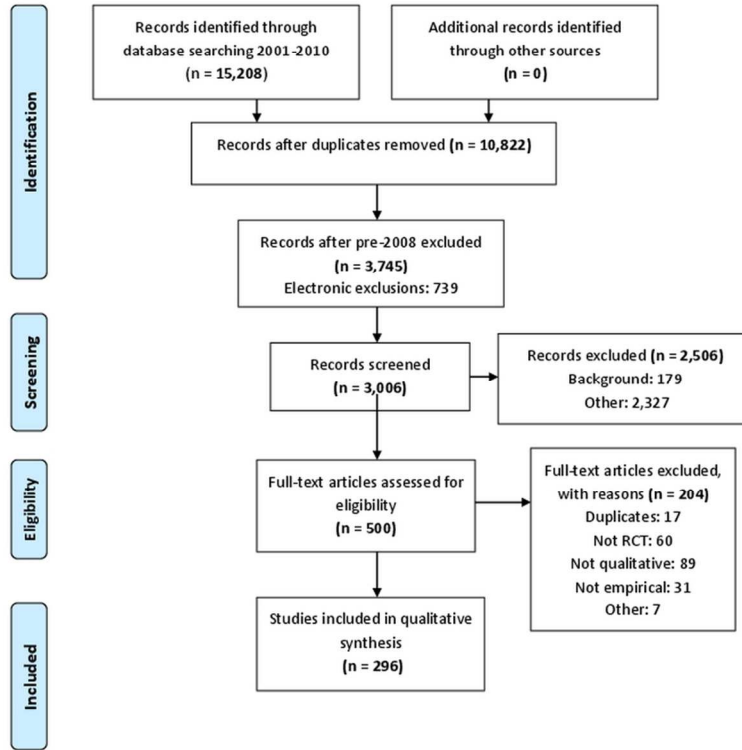

90x116mm (300 x 300 DPI)

Figure 3 Framework of the focus of qualitative research used with trials

| Category                                              | Sub-category                                              |
|-------------------------------------------------------|-----------------------------------------------------------|
| Intervention content and delivery                     | Intervention development                                  |
|                                                       | Intervention components                                   |
|                                                       | Models, mechanisms and underlying theory development      |
|                                                       | Perceived value and benefits of intervention              |
|                                                       | Acceptability of intervention in principle                |
|                                                       | Feasibility and acceptability of intervention in practice |
|                                                       | Fidelity, reach and dose of intervention                  |
| Implementation of the intervention in the real world  |                                                           |
| Trial design, conduct and processes                   | Recruitment and retention                                 |
|                                                       | Diversity of participants                                 |
|                                                       | Trial participation                                       |
|                                                       | Acceptability of the trial in principle                   |
|                                                       | Acceptability of the trial in practice                    |
|                                                       | Ethical conduct of trial                                  |
|                                                       | Adaptation of trial conduct to local context              |
| Impact of trial on staff, researchers or participants |                                                           |
| Outcomes                                              | Breadth of outcomes                                       |
|                                                       | Variation in outcomes                                     |
| Measures of process and outcome                       | Accuracy of measures                                      |
|                                                       | Completion of outcome measures                            |
|                                                       | Development of outcome measures                           |
| Target condition                                      | Experience of the disease, behaviour or beliefs           |

90x116mm (300 x 300 DPI)

Figure 4 Potential value of the qualitative research to the generation of evidence of effectiveness

|                | Potential value                                                           | Examples                                                                                                                                                                                                                   |
|----------------|---------------------------------------------------------------------------|----------------------------------------------------------------------------------------------------------------------------------------------------------------------------------------------------------------------------|
| Bias           | Avoids measurement bias                                                   | Helps test face and content validity of instruments in the relevant patient group.                                                                                                                                         |
| Efficiency     | Increases recruitment rate                                                | Use of observation and interviews to identify problems with recruitment in a specific trial.                                                                                                                               |
|                | Saves money                                                               | Stops attempts to undertake full trials of poor or unacceptable interventions, or use unacceptable trial designs.<br><br>Ensures full trials, which can be very expensive, are only undertaken on optimised interventions. |
| Ethics         | Makes trials sensitive to human beings                                    | Recruitment and communication strategies can pay attention to health professionals and patients so that the experience is positive for them.                                                                               |
|                | Improves informed consent                                                 | Challenges current assumptions about gold standard informed consent which values information over communication.                                                                                                           |
| Implementation | Facilitates replicability of intervention in the real world               | Describes components of the intervention so that others can make use of the full intervention in the real world.                                                                                                           |
|                | Facilitates transferability of findings in the real world                 | Identifies mechanism of action or contextual issues important for success.                                                                                                                                                 |
| Interpretation | Explains trial findings                                                   | Explains why trials were null. This may prevent another trial of a similar intervention.                                                                                                                                   |
|                |                                                                           | Contextualises results of successful interventions to support dissemination and transferability in the real world.                                                                                                         |
|                |                                                                           | Explains variation in outcomes.                                                                                                                                                                                            |
| Relevance      | Ensures interventions meet the needs of health professionals and patients | Identifies the value of the intervention to important stakeholders.                                                                                                                                                        |
|                |                                                                           | Ensures the intervention in contextually or culturally appropriate in different settings.                                                                                                                                  |
| Success        | Makes a trial successful, feasible, viable                                | Engenders stakeholder support for the trial.                                                                                                                                                                               |
|                |                                                                           | Makes a trial locally appropriate to cultural needs.                                                                                                                                                                       |
| Validity       | Improves internal validity                                                | Ensures right measures are used to measure right outcomes.                                                                                                                                                                 |
|                | Improves external validity                                                | Helps to broaden recruitment to hard to reach groups.                                                                                                                                                                      |

.....

.....

90x116mm (300 x 300 DPI)
